# Supplementary material for: Co-expression of synaptic genes in the sponge Amphimedon queenslandica uncovers ancient neural submodules
Source: PubMed Central journal article supplement (PMC6823388; doi:10.1038/s41598-019-51282-x), 2019-10-31

## **Co-expression of synaptic genes in the sponge *Amphimedon queenslandica* uncovers ancient neural submodules**

Eunice Wong, Jan Mölter, Victor Anggono, Sandie M. Degnan and Bernard M. Degnan

### **Supplementary Files**

**Supplementary Table 1. Enriched pathways in *Amphimedon* developmental and cell type expression profiles.** Expression modules with more than three interacting nodes are mapped to curated pathways in *Homo sapiens* documented by Reactome<sup>137</sup>, KEGG<sup>58</sup> and Panther<sup>138</sup> (FDR < 0.05, p < 0.05).

### **Supplementary Fig. 1. Orthologues of synaptic genes in *Amphimedon queenslandica*.**

Genome assembly Aqu2.1<sup>96</sup> is used for extraction of orthologues. Protein domain arrangements are shown in comparison to those of corresponding orthologues in *Homo sapiens* (grey-shaded).

### **Supplementary Fig. 2. Developmental expression profile of *Amphimedon* genes mapped to the KEGG<sup>58</sup> endocytosis and bacterial invasion of epithelial cells pathway.**

Genes of the (A-B) KEGG endocytosis, (C-E) bacterial invasion of epithelial cells pathways. Genes of the A KEGG endocytosis pathway and the C KEGG bacterial invasion of epithelial cells pathway are enriched in co-expression modules of *Amphimedon* synaptic genes (Figs 3, 4). *Amphimedon* possess homologues of the majority of genes coding both pathways in *Homo sapiens*. Developmental expression profiles of the orthologues coding the B endocytosis pathway and the D bacterial invasion of epithelial cells pathway are largely developmentally

co-regulated (clades consisting the mapped synaptic genes are shaded grey), suggesting that both pathways are conserved in sponge. (E) Developmentally co-expressing genes of the bacterial invasion of epithelial cells pathway (grey clade in D) are expressed in all three cell types. Green, genes with *Amphimedon* orthologues; blue, genes without *Amphimedon* orthologues; orange, synaptic genes mapped to the corresponding pathway (see Figs 3, 4).

**Supplementary Fig. 3. Validation of co-expressing gene sets via Monte Carlo sampling.**

Boxplots indicate range of number of clades each gene set of interest (GOI) is observed in when sampled over 10,000 developmental / cell type specific expression dendrograms with randomly selected Aqu2.1 protein coding genes. This is contrasted against five sets of randomly selected control genes sampled in the same manner. Boxes show the interquartile range (IQR) and whiskers extend to 1.5 IQR; bold line and circles represent median and outliers respectively. Kruskal-Wallis test and Dunn's post-hoc test confirm all differences between GOI and controls are significant.

Supplementary Table 1.

| Module (cell type)                                                        | Pathway                                                                              | Ratio of protein in Gene Set                                  | No. of proteins in geneset | Protein frm network (>3) | P-value (<0.05) | FDR (<0.05)                 | Nodes                                                                                 |                                                            |
|---------------------------------------------------------------------------|--------------------------------------------------------------------------------------|---------------------------------------------------------------|----------------------------|--------------------------|-----------------|-----------------------------|---------------------------------------------------------------------------------------|------------------------------------------------------------|
| O1                                                                        | Synaptic vesicle cycle(K)                                                            | 0.0058                                                        | 63                         | 3                        | 1.93E-06        | 8.50E-05                    | STX1B, CLTC, ATP6V1E1                                                                 |                                                            |
|                                                                           | Phagosome(K)                                                                         | 0.0142                                                        | 154                        | 3                        | 2.79E-05        | 6.13E-04                    | STX12, ATP6V1E1, RAB7A                                                                |                                                            |
|                                                                           | MHC class II antigen presentation(R)                                                 | 0.0082                                                        | 89                         | 2                        | 6.60E-04        | 9.24E-03                    | CLTC, RAB7A                                                                           |                                                            |
|                                                                           | Metabotropic glutamate receptor group III pathway(P)                                 | 0.0006                                                        | 6                          | 1                        | 2.76E-03        | 0.0303                      | STX1B                                                                                 |                                                            |
|                                                                           | Metabotropic glutamate receptor group II pathway(P)                                  | 0.0008                                                        | 9                          | 1                        | 4.13E-03        | 0.0309                      | STX1B                                                                                 |                                                            |
|                                                                           | Endocytosis(K)                                                                       | 0.0239                                                        | 260                        | 2                        | 5.46E-03        | 0.0309                      | CLTC, RAB7A                                                                           |                                                            |
|                                                                           | Synaptic vesicle trafficking(P)                                                      | 0.0012                                                        | 13                         | 1                        | 5.97E-03        | 0.0309                      | STX1B                                                                                 |                                                            |
|                                                                           | LGI-ADAM interactions(R)                                                             | 0.0013                                                        | 14                         | 1                        | 6.42E-03        | 0.0309                      | STX1B                                                                                 |                                                            |
|                                                                           | Collecting duct acid secretion(K)                                                    | 0.0025                                                        | 27                         | 1                        | 0.0124          | 0.0309                      | ATP6V1E1                                                                              |                                                            |
|                                                                           | ROS, RNS production in phagocytes(R)                                                 | 0.0029                                                        | 32                         | 1                        | 0.0146          | 0.0309                      | ATP6V1E1                                                                              |                                                            |
|                                                                           | FAS (CD95) signaling pathway(N)                                                      | 0.0029                                                        | 32                         | 1                        | 0.0146          | 0.0309                      | CLTC                                                                                  |                                                            |
|                                                                           | IL8- and CXCR2-mediated signaling events(N)                                          | 0.0031                                                        | 34                         | 1                        | 0.0155          | 0.0309                      | RAB7A                                                                                 |                                                            |
|                                                                           | SNARE interactions in vesicular transport(K)                                         | 0.0031                                                        | 34                         | 1                        | 0.0155          | 0.0309                      | STX1B                                                                                 |                                                            |
|                                                                           | Arf6 trafficking events(N)                                                           | 0.0031                                                        | 34                         | 1                        | 0.0155          | 0.0309                      | CLTC                                                                                  |                                                            |
|                                                                           | Iron uptake and transport(R)                                                         | 0.0035                                                        | 38                         | 1                        | 0.0174          | 0.0309                      | ATP6V1E1                                                                              |                                                            |
|                                                                           | TBC/RABGAPs(R)                                                                       | 0.0039                                                        | 42                         | 1                        | 0.0192          | 0.0309                      | RAB7A                                                                                 |                                                            |
|                                                                           | trans-Golgi Network Vesicle Budding(R)                                               | 0.0041                                                        | 45                         | 1                        | 0.0205          | 0.0309                      | CLTC                                                                                  |                                                            |
|                                                                           | Endocrine and other factor-regulated calcium reabsorption(K)                         | 0.0043                                                        | 47                         | 1                        | 0.0214          | 0.0309                      | CLTC                                                                                  |                                                            |
|                                                                           | Posttranslational regulation of adherens junction stability and disassembly(N)       | 0.0044                                                        | 48                         | 1                        | 0.0219          | 0.0309                      | RAB7A                                                                                 |                                                            |
|                                                                           | Vibrio cholerae infection(K)                                                         | 0.0047                                                        | 51                         | 1                        | 0.0232          | 0.0309                      | ATP6V1E1                                                                              |                                                            |
|                                                                           | Parkinson disease(P)                                                                 | 0.0056                                                        | 61                         | 1                        | 0.0278          | 0.0309                      | STX12                                                                                 |                                                            |
|                                                                           | IL12-mediated signaling events(N)                                                    | 0.0056                                                        | 61                         | 1                        | 0.0278          | 0.0309                      | RAB7A                                                                                 |                                                            |
|                                                                           | Epithelial cell signaling in Helicobacter pylori infection(K)                        | 0.0063                                                        | 68                         | 1                        | 0.0309          | 0.0309                      | ATP6V1E1                                                                              |                                                            |
|                                                                           | RAB GEFs exchange GTP for GDP on RABs(R)                                             | 0.0067                                                        | 73                         | 1                        | 0.0331          | 0.0331                      | RAB7A                                                                                 |                                                            |
|                                                                           | Bacterial invasion of epithelial cells(K)                                            | 0.0072                                                        | 78                         | 1                        | 0.0354          | 0.0354                      | CLTC                                                                                  |                                                            |
|                                                                           | L1CAM interactions(R)                                                                | 0.0075                                                        | 82                         | 1                        | 0.0372          | 0.0372                      | CLTC                                                                                  |                                                            |
|                                                                           | Salmonella infection(K)                                                              | 0.0079                                                        | 86                         | 1                        | 0.0389          | 0.0389                      | RAB7A                                                                                 |                                                            |
|                                                                           | Rheumatoid arthritis(K)                                                              | 0.0083                                                        | 90                         | 1                        | 0.0407          | 0.0407                      | ATP6V1E1                                                                              |                                                            |
|                                                                           | Lipid digestion, mobilization, and transport(R)                                      | 0.0084                                                        | 91                         | 1                        | 0.0412          | 0.0412                      | CLTC                                                                                  |                                                            |
|                                                                           | Amoebiasis(K)                                                                        | 0.009                                                         | 98                         | 1                        | 0.0443          | 0.0443                      | RAB7A                                                                                 |                                                            |
|                                                                           | Heterotrimeric G-protein signaling pathway-Gq alpha and Go alpha mediated pathway(P) | 0.0099                                                        | 108                        | 1                        | 0.0487          | 0.0487                      | CLTC                                                                                  |                                                            |
|                                                                           | Gr                                                                                   | Synaptic vesicle cycle(K)                                     | 0.0058                     | 63                       | 7               | 7.88E-15                    | 2.84E-13                                                                              | ATP6V0B, CLTB, AP2A2, ATP6V0C, ATP6V1D, ATP6V1C1, ATP6V0A1 |
|                                                                           |                                                                                      | ROS, RNS production in phagocytes(R)                          | 0.0029                     | 32                       | 5               | 2.76E-11                    | 4.97E-10                                                                              | ATP6V0B, ATP6V0C, ATP6V1D, ATP6V1C1, ATP6V0A1              |
|                                                                           |                                                                                      | Iron uptake and transport(R)                                  | 0.0035                     | 38                       | 5               | 6.51E-11                    | 7.81E-10                                                                              | ATP6V0B, ATP6V0C, ATP6V1D, ATP6V1C1, ATP6V0A1              |
|                                                                           |                                                                                      | Vibrio cholerae infection(K)                                  | 0.0047                     | 51                       | 5               | 2.82E-10                    | 2.54E-09                                                                              | ATP6V0B, ATP6V0C, ATP6V1D, ATP6V1C1, ATP6V0A1              |
|                                                                           |                                                                                      | Epithelial cell signaling in Helicobacter pylori infection(K) | 0.0063                     | 68                       | 5               | 1.18E-09                    | 8.29E-09                                                                              | ATP6V0B, ATP6V0C, ATP6V1D, ATP6V1C1, ATP6V0A1              |
|                                                                           |                                                                                      | Collecting duct acid secretion(K)                             | 0.0025                     | 27                       | 4               | 4.75E-09                    | 2.39E-08                                                                              | ATP6V0C, ATP6V1D, ATP6V1C1, ATP6V0A1                       |
|                                                                           |                                                                                      | Rheumatoid arthritis(K)                                       | 0.0083                     | 90                       | 5               | 4.78E-09                    | 2.39E-08                                                                              | ATP6V0B, ATP6V0C, ATP6V1D, ATP6V1C1, ATP6V0A1              |
| Oxidative phosphorylation(K)                                              |                                                                                      | 0.0122                                                        | 133                        | 5                        | 3.32E-08        | 1.33E-07                    | ATP6V0B, ATP6V0C, ATP6V1D, ATP6V1C1, ATP6V0A1                                         |                                                            |
| Phagosome(K)                                                              |                                                                                      | 0.0142                                                        | 154                        | 5                        | 6.87E-08        | 2.75E-07                    | ATP6V0B, ATP6V0C, ATP6V1D, ATP6V1C1, ATP6V0A1                                         |                                                            |
| Ion channel transport(R)                                                  |                                                                                      | 0.0156                                                        | 169                        | 5                        | 1.09E-07        | 3.26E-07                    | ATP6V0B, ATP6V0C, ATP6V1D, ATP6V1C1, ATP6V0A1                                         |                                                            |
| Signaling by Insulin receptor(R)                                          |                                                                                      | 0.0255                                                        | 277                        | 5                        | 1.24E-06        | 3.73E-06                    | ATP6V0B, ATP6V0C, ATP6V1D, ATP6V1C1, ATP6V0A1                                         |                                                            |
| Lysosome(K)                                                               |                                                                                      | 0.0113                                                        | 123                        | 4                        | 1.98E-06        | 5.93E-06                    | ATP6V0B, CLTB, ATP6V0C, ATP6V0A1                                                      |                                                            |
| Neutrophil degranulation(R)                                               |                                                                                      | 0.0362                                                        | 393                        | 4                        | 1.86E-04        | 3.72E-04                    | AP2A2, ATP6V0C, ATP6V1D, ATP6V0A1                                                     |                                                            |
| Tuberculosis(K)                                                           |                                                                                      | 0.0165                                                        | 179                        | 3                        | 3.48E-04        | 6.97E-04                    | ATP6V0B, ATP6V0C, ATP6V0A1                                                            |                                                            |
| Endocrine and other factor-regulated calcium reabsorption(K)              |                                                                                      | 0.0043                                                        | 47                         | 2                        | 6.60E-04        | 1.32E-03                    | CLTB, AP2A2                                                                           |                                                            |
| Interactions of neuroligins and neuroligins at synapses(R)                |                                                                                      | 0.0046                                                        | 50                         | 2                        | 7.46E-04        | 1.49E-03                    | DLG2, SHANK2                                                                          |                                                            |
| Metabolic pathways(K)                                                     |                                                                                      | 0.1165                                                        | 1266                       | 5                        | 1.80E-03        | 3.60E-03                    | ATP6V0B, ATP6V0C, ATP6V1D, ATP6V1C1, ATP6V0A1                                         |                                                            |
| Clathrin-mediated endocytosis(R)                                          |                                                                                      | 0.0108                                                        | 117                        | 2                        | 3.97E-03        | 4.24E-03                    | CLTB, AP2A2                                                                           |                                                            |
| Huntington disease(P)                                                     |                                                                                      | 0.0111                                                        | 121                        | 2                        | 4.24E-03        | 4.24E-03                    | CLTB, AP2A2                                                                           |                                                            |
| mTOR signaling pathway(K)                                                 |                                                                                      | 0.0142                                                        | 154                        | 2                        | 6.77E-03        | 6.77E-03                    | ATP6V1D, ATP6V1C1                                                                     |                                                            |
| Huntington's disease(K)                                                   |                                                                                      | 0.0178                                                        | 193                        | 2                        | 0.0105          | 0.0105                      | CLTB, AP2A2                                                                           |                                                            |
| Arf1 pathway(N)                                                           |                                                                                      | 0.0018                                                        | 20                         | 1                        | 0.0164          | 0.0164                      | CLTB                                                                                  |                                                            |
| Endocytosis(K)                                                            | 0.0239                                                                               | 260                                                           | 2                          | 0.0184                   | 0.0184          | CLTB, AP2A2                 |                                                                                       |                                                            |
| adp-ribosylation factor(B)                                                | 0.0026                                                                               | 28                                                            | 1                          | 0.023                    | 0.023           | CLTB                        |                                                                                       |                                                            |
| Li                                                                        | Synaptic vesicle cycle(K)                                                            | 0.0058                                                        | 63                         | 11                       | 1.11E-16        | 1.99E-14                    | SNAP25, CACNA1A, AP2S1, ATP6V0E2, AP2M1, ATP6V1F, AP2B1, DNMI, DNMI2, STX1B, ATP6V0D1 |                                                            |
|                                                                           | Clathrin-mediated endocytosis(R)                                                     | 0.0108                                                        | 117                        | 7                        | 9.22E-09        | 8.20E-07                    | AP2S1, PACSIN2, AP2M1, AP2B1, EPN1, DNMI2, AMPH                                       |                                                            |
|                                                                           | Endocrine and other factor-regulated calcium reabsorption(K)                         | 0.0043                                                        | 47                         | 5                        | 9.23E-08        | 5.02E-06                    | AP2S1, AP2M1, AP2B1, DNMI, DNMI2                                                      |                                                            |
|                                                                           | Endocytosis(K)                                                                       | 0.0239                                                        | 260                        | 8                        | 1.14E-07        | 5.02E-06                    | RAB5C, AP2S1, AP2M1, AP2B1, DNMI, EPN1, DNMI2, AMPH                                   |                                                            |
|                                                                           | Bacterial invasion of epithelial cells(K)                                            | 0.0072                                                        | 78                         | 5                        | 1.11E-06        | 3.87E-05                    | CDH1, CTNNA1, DNMI1, DNMI2, CTNNB1                                                    |                                                            |
|                                                                           | Arf6 trafficking events(N)                                                           | 0.0031                                                        | 34                         | 4                        | 1.36E-06        | 3.93E-05                    | CDH1, CTNNA1, DNMI2, CTNNB1                                                           |                                                            |
|                                                                           | Posttranslational regulation of adherens junction stability and disassembly(N)       | 0.0044                                                        | 48                         | 4                        | 5.27E-06        | 1.32E-04                    | CDH1, CTNNA1, DNMI2, CTNNB1                                                           |                                                            |
|                                                                           | E-cadherin signaling in keratinocytes(N)                                             | 0.0019                                                        | 21                         | 3                        | 1.81E-05        | 3.99E-04                    | CDH1, CTNNA1, CTNNB1                                                                  |                                                            |
|                                                                           | Adherens junction(K)                                                                 | 0.0066                                                        | 72                         | 4                        | 2.56E-05        | 4.87E-04                    | PTPRF, CDH1, CTNNA1, CTNNB1                                                           |                                                            |
|                                                                           | Collecting duct acid secretion(K)                                                    | 0.0025                                                        | 27                         | 3                        | 3.82E-05        | 6.50E-04                    | ATP6V0E2, ATP6V1F, ATP6V0D1                                                           |                                                            |
|                                                                           | Nectin adhesion pathway(N)                                                           | 0.0028                                                        | 30                         | 3                        | 5.22E-05        | 7.57E-04                    | CDH1, CTNNA1, CTNNB1                                                                  |                                                            |
|                                                                           | EPH-Ephrin signaling(R)                                                              | 0.0082                                                        | 89                         | 4                        | 5.82E-05        | 7.57E-04                    | AP2S1, AP2M1, AP2B1, DNMI                                                             |                                                            |
|                                                                           | MHC class II antigen presentation(R)                                                 | 0.0082                                                        | 89                         | 4                        | 5.82E-05        | 7.57E-04                    | AP2S1, AP2M1, AP2B1, DNMI                                                             |                                                            |
|                                                                           | ROS, RNS production in phagocytes(R)                                                 | 0.0029                                                        | 32                         | 3                        | 6.31E-05        | 7.57E-04                    | ATP6V0E2, ATP6V1F, ATP6V0D1                                                           |                                                            |
|                                                                           | SNARE interactions in vesicular transport(K)                                         | 0.0031                                                        | 34                         | 3                        | 7.54E-05        | 8.30E-04                    | STX16, VTI1A, STX1B                                                                   |                                                            |
|                                                                           | Internalization of ErbB1(N)                                                          | 0.0032                                                        | 35                         | 3                        | 8.22E-05        | 8.93E-04                    | DNMI1, EPN1, AMPH                                                                     |                                                            |
|                                                                           | E-cadherin signaling in the nascent adherens junction(N)                             | 0.0033                                                        | 36                         | 3                        | 8.93E-05        | 8.93E-04                    | CDH1, CTNNA1, CTNNB1                                                                  |                                                            |
|                                                                           | Iron uptake and transport(R)                                                         | 0.0035                                                        | 38                         | 3                        | 1.05E-04        | 9.42E-04                    | ATP6V0E2, ATP6V1F, ATP6V0D1                                                           |                                                            |
|                                                                           | Stabilization and expansion of the E-cadherin adherens junction(N)                   | 0.0039                                                        | 42                         | 3                        | 1.40E-04        | 1.13E-03                    | CDH1, CTNNA1, CTNNB1                                                                  |                                                            |
|                                                                           | Beta-catenin independent WNT signaling(R)                                            | 0.0103                                                        | 112                        | 4                        | 1.41E-04        | 1.13E-03                    | AP2S1, AP2M1, AP2B1, CTNNB1                                                           |                                                            |
|                                                                           | Vibrio cholerae infection(K)                                                         | 0.0047                                                        | 51                         | 3                        | 2.48E-04        | 1.98E-03                    | ATP6V0E2, ATP6V1F, ATP6V0D1                                                           |                                                            |
|                                                                           | Endometrial cancer(K)                                                                | 0.0048                                                        | 52                         | 3                        | 2.62E-04        | 2.05E-03                    | CDH1, CTNNA1, CTNNB1                                                                  |                                                            |
|                                                                           | RAC1 signaling pathway(N)                                                            | 0.005                                                         | 54                         | 3                        | 2.93E-04        | 2.05E-03                    | CDH1, CTNNA1, CTNNB1                                                                  |                                                            |
|                                                                           | endocytotic role of ndk phosphins and dynamin(B)                                     | 0.0012                                                        | 13                         | 2                        | 4.56E-04        | 2.75E-03                    | AP2M1, EPN1                                                                           |                                                            |
|                                                                           | Synaptic vesicle trafficking(P)                                                      | 0.0012                                                        | 13                         | 2                        | 4.56E-04        | 2.75E-03                    | SNAP25, STX1B                                                                         |                                                            |
|                                                                           | Signaling events mediated by VEGFR1 and VEGFR2(N)                                    | 0.0058                                                        | 63                         | 3                        | 4.58E-04        | 2.75E-03                    | CTNNA1, DNMI2, CTNNB1                                                                 |                                                            |
|                                                                           | Phagosome(K)                                                                         | 0.0142                                                        | 154                        | 4                        | 4.70E-04        | 2.82E-03                    | RAB5C, ATP6V0E2, ATP6V1F, ATP6V0D1                                                    |                                                            |
|                                                                           | Epithelial cell signaling in Helicobacter pylori infection(K)                        | 0.0063                                                        | 68                         | 3                        | 5.72E-04        | 3.32E-03                    | ATP6V0E2, ATP6V1F, ATP6V0D1                                                           |                                                            |
|                                                                           | CDC42 signaling events(N)                                                            | 0.0064                                                        | 70                         | 3                        | 6.22E-04        | 3.32E-03                    | CDH1, CTNNA1, CTNNB1                                                                  |                                                            |
|                                                                           | Ion channel transport(R)                                                             | 0.0156                                                        | 169                        | 4                        | 6.65E-04        | 3.32E-03                    | ATP6V0E2, ATP6V1F, ATP2B2, ATP6V0D1                                                   |                                                            |
| Signaling events mediated by Hepatocyte Growth Factor Receptor (c-Met)(N) | 0.0074                                                                               | 80                                                            | 3                          | 9.14E-04                 | 4.57E-03        | CDH1, CTNNA1, CTNNB1        |                                                                                       |                                                            |
| L1CAM interactions(R)                                                     | 0.0075                                                                               | 82                                                            | 3                          | 9.81E-04                 | 4.90E-03        | AP2S1, AP2M1, AP2B1         |                                                                                       |                                                            |
| Rheumatoid arthritis(K)                                                   | 0.0083                                                                               | 90                                                            | 3                          | 1.28E-03                 | 6.14E-03        | ATP6V0E2, ATP6V1F, ATP6V0D1 |                                                                                       |                                                            |
| Lipid digestion, mobilization, and transport(R)                           | 0.0084                                                                               | 91                                                            | 3                          | 1.32E-03                 | 6.14E-03        | AP2S1, AP2M1, AP2B1         |                                                                                       |                                                            |
| Myogenesis(R)                                                             | 0.0022                                                                               | 24                                                            | 2                          | 1.53E-03                 | 6.14E-03        | CTNNA1, CTNNB1              |                                                                                       |                                                            |
| Rap1 signaling pathway(K)                                                 | 0.0195                                                                               | 212                                                           | 4                          | 1.54E-03                 | 6.14E-03        | CDH1, CTNNB1, PFN4, PFN2    |                                                                                       |                                                            |

|           |                                                                                           |        |      |   |          |          |                           |
|-----------|-------------------------------------------------------------------------------------------|--------|------|---|----------|----------|---------------------------|
|           | Cadherin signaling pathway(P)                                                             | 0.0092 | 100  | 3 | 1.73E-03 | 6.92E-03 | CDH1,CTNNA1,CTNNB1        |
|           | Thyroid cancer(K)                                                                         | 0.0027 | 29   | 2 | 2.22E-03 | 8.87E-03 | CDH1,CTNNB1               |
|           | Alzheimer disease-presenilin pathway(P)                                                   | 0.0102 | 111  | 3 | 2.32E-03 | 9.30E-03 | CDH1,CTNNA1,CTNNB1        |
|           | N-cadherin signaling events(N)                                                            | 0.003  | 33   | 2 | 2.86E-03 | 0.0114   | CTNNA1,CTNNB1             |
|           | Oxidative phosphorylation(K)                                                              | 0.0122 | 133  | 3 | 3.86E-03 | 0.0154   | ATP6V0E2,ATP6V1F,ATP6V0D1 |
|           | Neurotransmitter Receptor Binding And Downstream Transmission In The Postsynaptic Cell(R) | 0.0123 | 134  | 3 | 3.94E-03 | 0.0158   | AP2S1,AP2M1,AP2B1         |
|           | PAR1-mediated thrombin signaling events(N)                                                | 0.004  | 43   | 2 | 4.78E-03 | 0.0174   | DNM1,DNM2                 |
|           | Apoptotic execution phase(R)                                                              | 0.0043 | 47   | 2 | 5.67E-03 | 0.0174   | CDH1,CTNNB1               |
|           | Hippo signaling pathway(K)                                                                | 0.0142 | 154  | 3 | 5.80E-03 | 0.0174   | CDH1,CTNNA1,CTNNB1        |
|           | AlphaE beta7 integrin cell surface interactions(N)                                        | 0.0003 | 3    | 1 | 7.15E-03 | 0.0215   | CDH1                      |
|           | Pathogenic Escherichia coli infection(K)                                                  | 0.0051 | 55   | 2 | 7.68E-03 | 0.023    | CDH1,CTNNB1               |
|           | Metabotropic glutamate receptor group I pathway(P)                                        | 0.0004 | 4    | 1 | 9.53E-03 | 0.0286   | HOMER1                    |
|           | Shigellosis(K)                                                                            | 0.006  | 65   | 2 | 0.0106   | 0.0317   | PFN4,PFN2                 |
|           | Huntington's disease(K)                                                                   | 0.0178 | 193  | 3 | 0.0107   | 0.0322   | AP2S1,AP2M1,AP2B1         |
|           | Cell junction organization(R)                                                             | 0.0064 | 70   | 2 | 0.0122   | 0.0365   | CDH1,CTNNA1               |
|           | Arrhythmogenic right ventricular cardiomyopathy (ARVC)(K)                                 | 0.0066 | 72   | 2 | 0.0128   | 0.0385   | CTNNA1,CTNNB1             |
|           | Metabotropic glutamate receptor group III pathway(P)                                      | 0.0006 | 6    | 1 | 0.0143   | 0.0426   | STX1B                     |
|           | Regulation of nuclear beta catenin signaling and target gene transcription(N)             | 0.0074 | 80   | 2 | 0.0157   | 0.0426   | CDH1,CTNNB1               |
|           | Depolarization of the Presynaptic Terminal Triggers the Opening of Calcium Channels(R)    | 0.0006 | 7    | 1 | 0.0166   | 0.0426   | CACNA1A                   |
|           | sumoylation as a mechanism to modulate ctbp-dependent gene responses(B)                   | 0.0006 | 7    | 1 | 0.0166   | 0.0426   | CDH1                      |
|           | Salmonella infection(K)                                                                   | 0.0079 | 86   | 2 | 0.0179   | 0.0426   | PFN4,PFN2                 |
|           | Integration of energy metabolism(R)                                                       | 0.0085 | 92   | 2 | 0.0204   | 0.0426   | SNAP25,CACNA1A            |
|           | Fc gamma R-mediated phagocytosis(K)                                                       | 0.0086 | 93   | 2 | 0.0208   | 0.0426   | DNM2,AMPH                 |
|           | Effects of Botulinum toxin(N)                                                             | 0.0008 | 9    | 1 | 0.0213   | 0.0426   | SNAP25                    |
|           | Metabotropic glutamate receptor group II pathway(P)                                       | 0.0008 | 9    | 1 | 0.0213   | 0.0426   | STX1B                     |
|           | Gap junction trafficking and regulation(R)                                                | 0.0008 | 9    | 1 | 0.0213   | 0.0426   | AP2M1                     |
|           | 5HT3 type receptor mediated signaling pathway(P)                                          | 0.0009 | 10   | 1 | 0.0237   | 0.0473   | SNAP25                    |
| <b>Te</b> | Synaptic vesicle cycle(K)                                                                 | 0.0058 | 63   | 2 | 2.00E-04 | 6.37E-03 | STX1B,CLTC                |
|           | MHC class II antigen presentation(R)                                                      | 0.0082 | 89   | 2 | 3.98E-04 | 6.37E-03 | CLTC,RAB7A                |
|           | Phagosome(K)                                                                              | 0.0142 | 154  | 2 | 1.18E-03 | 0.013    | STX12,RAB7A               |
|           | Metabotropic glutamate receptor group III pathway(P)                                      | 0.0006 | 6    | 1 | 2.21E-03 | 0.0166   | STX1B                     |
|           | Metabotropic glutamate receptor group II pathway(P)                                       | 0.0008 | 9    | 1 | 3.31E-03 | 0.0166   | STX1B                     |
|           | Endocytosis(K)                                                                            | 0.0239 | 260  | 2 | 3.33E-03 | 0.0166   | CLTC,RAB7A                |
|           | Synaptic_vesicle_trafficking(P)                                                           | 0.0012 | 13   | 1 | 4.78E-03 | 0.0191   | STX1B                     |
|           | LGI-ADAM interactions(R)                                                                  | 0.0013 | 14   | 1 | 5.14E-03 | 0.0206   | STX1B                     |
|           | FAS (CD95) signaling pathway(N)                                                           | 0.0029 | 32   | 1 | 0.0117   | 0.0223   | CLTC                      |
|           | IL8- and CXCR2-mediated signaling events(N)                                               | 0.0031 | 34   | 1 | 0.0125   | 0.0223   | RAB7A                     |
|           | SNARE interactions in vesicular transport(K)                                              | 0.0031 | 34   | 1 | 0.0125   | 0.0223   | STX1B                     |
|           | Arf6 trafficking events(N)                                                                | 0.0031 | 34   | 1 | 0.0125   | 0.0223   | CLTC                      |
|           | TBC/RABGAPs(R)                                                                            | 0.0039 | 42   | 1 | 0.0154   | 0.0223   | RAB7A                     |
|           | trans-Golgi Network Vesicle Budding(R)                                                    | 0.0041 | 45   | 1 | 0.0165   | 0.0223   | CLTC                      |
|           | Endocrine and other factor-regulated calcium reabsorption(K)                              | 0.0043 | 47   | 1 | 0.0172   | 0.0223   | CLTC                      |
|           | Posttranslational regulation of adherens junction stability and disassembly(N)            | 0.0044 | 48   | 1 | 0.0176   | 0.0223   | RAB7A                     |
|           | Parkinson disease(P)                                                                      | 0.0056 | 61   | 1 | 0.0223   | 0.0223   | STX12                     |
|           | IL12-mediated signaling events(N)                                                         | 0.0056 | 61   | 1 | 0.0223   | 0.0223   | RAB7A                     |
|           | RAB GEFs exchange GTP for GDP on RABs(R)                                                  | 0.0067 | 73   | 1 | 0.0266   | 0.0266   | RAB7A                     |
|           | Bacterial invasion of epithelial cells(K)                                                 | 0.0072 | 78   | 1 | 0.0284   | 0.0284   | CLTC                      |
|           | L1CAM interactions(R)                                                                     | 0.0075 | 82   | 1 | 0.0298   | 0.0298   | CLTC                      |
|           | Salmonella infection(K)                                                                   | 0.0079 | 86   | 1 | 0.0313   | 0.0313   | RAB7A                     |
|           | Lipid digestion, mobilization, and transport(R)                                           | 0.0084 | 91   | 1 | 0.0331   | 0.0331   | CLTC                      |
|           | Amoebiasis(K)                                                                             | 0.009  | 98   | 1 | 0.0356   | 0.0356   | RAB7A                     |
|           | Heterotrimeric G-protein signaling pathway-Gq alpha and Go alpha mediated pathway(P)      | 0.0099 | 108  | 1 | 0.0392   | 0.0392   | CLTC                      |
|           | Beta-catenin independent WNT signaling(R)                                                 | 0.0103 | 112  | 1 | 0.0406   | 0.0406   | CLTC                      |
|           | Clathrin-mediated endocytosis(R)                                                          | 0.0108 | 117  | 1 | 0.0424   | 0.0424   | CLTC                      |
|           | Lysosome(K)                                                                               | 0.0113 | 123  | 1 | 0.0445   | 0.0445   | CLTC                      |
| <b>Na</b> | Collecting duct acid secretion(K)                                                         | 0.0025 | 27   | 2 | 1.85E-05 | 3.29E-04 | ATP6V1A,ATP6V1B1          |
|           | ROS, RNS production in phagocytes(R)                                                      | 0.0029 | 32   | 2 | 2.60E-05 | 3.29E-04 | ATP6V1A,ATP6V1B1          |
|           | Iron uptake and transport(R)                                                              | 0.0035 | 38   | 2 | 3.66E-05 | 3.29E-04 | ATP6V1A,ATP6V1B1          |
|           | Vibrio cholerae infection(K)                                                              | 0.0047 | 51   | 2 | 6.59E-05 | 3.95E-04 | ATP6V1A,ATP6V1B1          |
|           | Synaptic vesicle cycle(K)                                                                 | 0.0058 | 63   | 2 | 1.00E-04 | 4.68E-04 | ATP6V1A,ATP6V1B1          |
|           | Epithelial cell signaling in Helicobacter pylori infection(K)                             | 0.0063 | 68   | 2 | 1.17E-04 | 4.68E-04 | ATP6V1A,ATP6V1B1          |
|           | Rheumatoid arthritis(K)                                                                   | 0.0083 | 90   | 2 | 2.05E-04 | 6.14E-04 | ATP6V1A,ATP6V1B1          |
|           | Oxidative phosphorylation(K)                                                              | 0.0122 | 133  | 2 | 4.46E-04 | 1.19E-03 | ATP6V1A,ATP6V1B1          |
|           | Phagosome(K)                                                                              | 0.0142 | 154  | 2 | 5.97E-04 | 1.19E-03 | ATP6V1A,ATP6V1B1          |
|           | mTOR signaling pathway(K)                                                                 | 0.0142 | 154  | 2 | 5.97E-04 | 1.19E-03 | ATP6V1A,ATP6V1B1          |
|           | Ion channel transport(R)                                                                  | 0.0156 | 169  | 2 | 7.18E-04 | 1.44E-03 | ATP6V1A,ATP6V1B1          |
|           | Signaling by Insulin receptor(R)                                                          | 0.0255 | 277  | 2 | 1.92E-03 | 3.83E-03 | ATP6V1A,ATP6V1B1          |
|           | 5HT3 type receptor mediated signaling pathway(P)                                          | 0.0009 | 10   | 1 | 2.76E-03 | 5.52E-03 | VAMP8                     |
|           | Beta3 adrenergic receptor signaling pathway(P)                                            | 0.0019 | 21   | 1 | 5.79E-03 | 5.79E-03 | VAMP8                     |
|           | Beta2 adrenergic receptor signaling pathway(P)                                            | 0.0019 | 21   | 1 | 5.79E-03 | 5.79E-03 | VAMP8                     |
|           | Oxytocin receptor mediated signaling pathway(P)                                           | 0.0019 | 21   | 1 | 5.79E-03 | 5.79E-03 | VAMP8                     |
|           | 5HT4 type receptor mediated signaling pathway(P)                                          | 0.0021 | 23   | 1 | 6.34E-03 | 6.34E-03 | VAMP8                     |
|           | Corticotropin releasing factor receptor signaling pathway(P)                              | 0.0023 | 25   | 1 | 6.89E-03 | 6.89E-03 | VAMP8                     |
|           | 5HT2 type receptor mediated signaling pathway(P)                                          | 0.0024 | 26   | 1 | 7.16E-03 | 7.16E-03 | VAMP8                     |
|           | Beta1 adrenergic receptor signaling pathway(P)                                            | 0.0025 | 27   | 1 | 7.44E-03 | 7.44E-03 | VAMP8                     |
|           | SNARE interactions in vesicular transport(K)                                              | 0.0031 | 34   | 1 | 9.36E-03 | 9.36E-03 | VAMP8                     |
|           | trans-Golgi Network Vesicle Budding(R)                                                    | 0.0041 | 45   | 1 | 0.0124   | 0.0124   | VAMP8                     |
|           | Clathrin-mediated endocytosis(R)                                                          | 0.0108 | 117  | 1 | 0.032    | 0.032    | VAMP8                     |
|           | Platelet activation(K)                                                                    | 0.0112 | 122  | 1 | 0.0333   | 0.0333   | VAMP8                     |
|           | Metabolic pathways(K)                                                                     | 0.1165 | 1266 | 2 | 0.0376   | 0.0376   | ATP6V1A,ATP6V1B1          |
| <b>Sk</b> | Metabotropic glutamate receptor group III pathway(P)                                      | 0.0006 | 6    | 2 | 1.83E-06 | 8.77E-05 | STX1B,STX1A               |
|           | Metabotropic glutamate receptor group II pathway(P)                                       | 0.0008 | 9    | 2 | 4.11E-06 | 9.87E-05 | STX1B,STX1A               |
|           | Synaptic_vesicle_trafficking(P)                                                           | 0.0012 | 13   | 2 | 8.57E-06 | 1.19E-04 | STX1B,STX1A               |
|           | LGI-ADAM interactions(R)                                                                  | 0.0013 | 14   | 2 | 9.94E-06 | 1.19E-04 | STX1B,STX1A               |
|           | SNARE interactions in vesicular transport(K)                                              | 0.0031 | 34   | 2 | 5.85E-05 | 5.26E-04 | STX1B,STX1A               |
|           | Synaptic vesicle cycle(K)                                                                 | 0.0058 | 63   | 2 | 2.00E-04 | 1.60E-03 | STX1B,STX1A               |
|           | Effects of Botulinum toxin(N)                                                             | 0.0008 | 9    | 1 | 3.31E-03 | 0.0199   | STX1A                     |
|           | RAB geranylgeranylation(R)                                                                | 0.0014 | 15   | 1 | 5.51E-03 | 0.0219   | RAB11B                    |
|           | tumor suppressor arf inhibits ribosomal biogenesis(B)                                     | 0.0017 | 19   | 1 | 6.98E-03 | 0.0219   | ABL1                      |
|           | Insulin processing(R)                                                                     | 0.0018 | 20   | 1 | 7.34E-03 | 0.0219   | STX1A                     |
|           | Signaling by Robo receptor(R)                                                             | 0.0021 | 23   | 1 | 8.44E-03 | 0.0219   | ABL1                      |
|           | Myogenesis(R)                                                                             | 0.0022 | 24   | 1 | 8.80E-03 | 0.0219   | ABL1                      |
|           | Lissencephaly gene (LIS1) in neuronal migration and development(N)                        | 0.0026 | 28   | 1 | 0.0103   | 0.0219   | ABL1                      |
|           | ATM pathway(N)                                                                            | 0.0031 | 34   | 1 | 0.0125   | 0.0219   | ABL1                      |
|           | Neurotransmitter Release Cycle(R)                                                         | 0.0037 | 40   | 1 | 0.0146   | 0.0219   | STX1A                     |
|           | TBC/RABGAPs(R)                                                                            | 0.0039 | 42   | 1 | 0.0154   | 0.0219   | RAB11B                    |

|                            |                                                                                           |                                                   |        |     |          |          |                                             |                         |
|----------------------------|-------------------------------------------------------------------------------------------|---------------------------------------------------|--------|-----|----------|----------|---------------------------------------------|-------------------------|
|                            | Vasopressin-regulated water reabsorption(K)                                               | 0.004                                             | 44     | 1   | 0.0161   | 0.0219   | RAB11B                                      |                         |
|                            | DNA Double Strand Break Response(R)                                                       | 0.0041                                            | 45     | 1   | 0.0165   | 0.0219   | ABL1                                        |                         |
|                            | Posttranslational regulation of adherens junction stability and disassembly(N)            | 0.0044                                            | 48     | 1   | 0.0176   | 0.0219   | ABL1                                        |                         |
|                            | Validated transcriptional targets of TAp63 isoforms(N)                                    | 0.0045                                            | 49     | 1   | 0.0179   | 0.0219   | ABL1                                        |                         |
|                            | Interactions of neuroligins and neuroligins at synapses(R)                                | 0.0046                                            | 50     | 1   | 0.0183   | 0.0219   | STX1A                                       |                         |
|                            | Pathogenic Escherichia coli infection(K)                                                  | 0.0051                                            | 55     | 1   | 0.0201   | 0.0219   | ABL1                                        |                         |
|                            | p53 pathway(N)                                                                            | 0.0052                                            | 57     | 1   | 0.0208   | 0.0219   | ABL1                                        |                         |
|                            | Viral myocarditis(K)                                                                      | 0.0054                                            | 59     | 1   | 0.0215   | 0.0219   | ABL1                                        |                         |
|                            | Neurotrophic factor-mediated Trk receptor signaling(N)                                    | 0.0055                                            | 60     | 1   | 0.0219   | 0.0219   | ABL1                                        |                         |
|                            | Regulation of retinoblastoma protein(N)                                                   | 0.0059                                            | 64     | 1   | 0.0234   | 0.0234   | ABL1                                        |                         |
|                            | Shigellosis(K)                                                                            | 0.006                                             | 65     | 1   | 0.0237   | 0.0237   | ABL1                                        |                         |
|                            | Regulation of Telomerase(N)                                                               | 0.0063                                            | 68     | 1   | 0.0248   | 0.0248   | ABL1                                        |                         |
|                            | Amphetamine addiction(K)                                                                  | 0.0063                                            | 68     | 1   | 0.0248   | 0.0248   | STX1A                                       |                         |
|                            | Chronic myeloid leukemia(K)                                                               | 0.0067                                            | 73     | 1   | 0.0266   | 0.0266   | ABL1                                        |                         |
|                            | p73 transcription factor network(N)                                                       | 0.0069                                            | 75     | 1   | 0.0273   | 0.0273   | ABL1                                        |                         |
|                            | Insulin secretion(K)                                                                      | 0.0078                                            | 85     | 1   | 0.0309   | 0.0309   | STX1A                                       |                         |
|                            | HDR through Homologous Recombination (HR) or Single Strand Annealing (SSA)(R)             | 0.0078                                            | 85     | 1   | 0.0309   | 0.0309   | ABL1                                        |                         |
|                            | ErbB signaling pathway(K)                                                                 | 0.0081                                            | 88     | 1   | 0.032    | 0.032    | ABL1                                        |                         |
|                            | Integration of energy metabolism(R)                                                       | 0.0085                                            | 92     | 1   | 0.0334   | 0.0334   | STX1A                                       |                         |
|                            | Factors involved in megakaryocyte development and platelet production(R)                  | 0.0101                                            | 110    | 1   | 0.0399   | 0.0399   | ABL1                                        |                         |
|                            | PDGFR-beta signaling pathway(N)                                                           | 0.011                                             | 120    | 1   | 0.0434   | 0.0434   | ABL1                                        |                         |
|                            | Neurotrophin signaling pathway(K)                                                         | 0.0111                                            | 121    | 1   | 0.0438   | 0.0438   | ABL1                                        |                         |
|                            | Cell cycle(K)                                                                             | 0.0114                                            | 124    | 1   | 0.0449   | 0.0449   | ABL1                                        |                         |
|                            | AMPK signaling pathway(K)                                                                 | 0.0114                                            | 124    | 1   | 0.0449   | 0.0449   | RAB11B                                      |                         |
| <b>Pu</b>                  | Neurotransmitter Receptor Binding And Downstream Transmission In The Postsynaptic Cell(R) | 0.0123                                            | 134    | 6   | 1.60E-08 | 2.83E-06 | CAMK2B, GABBR2, GABBR1, PRKCB, GRIP1, PICK1 |                         |
|                            | Neurotransmitter Release Cycle(R)                                                         | 0.0037                                            | 40     | 3   | 2.20E-05 | 1.93E-03 | UNC13B, SYT1, PPF1A2                        |                         |
|                            | Effects of Botulinum toxin(N)                                                             | 0.0008                                            | 9      | 2   | 7.15E-05 | 3.66E-03 | UNC13B, SYT1                                |                         |
|                            | Axon guidance(K)                                                                          | 0.0163                                            | 177    | 4   | 8.32E-05 | 3.66E-03 | CAMK2B, SEMA5B, EPHB1, PLXNA3               |                         |
|                            | Synaptic vesicle trafficking(P)                                                           | 0.0012                                            | 13     | 2   | 1.49E-04 | 5.21E-03 | UNC13B, SYT1                                |                         |
|                            | GABAergic synapse(K)                                                                      | 0.0081                                            | 88     | 3   | 2.25E-04 | 5.50E-03 | GABBR2, GABBR1, PRKCB                       |                         |
|                            | Morphine addiction(K)                                                                     | 0.0084                                            | 91     | 3   | 2.48E-04 | 5.50E-03 | GABBR2, GABBR1, PRKCB                       |                         |
|                            | nitric oxide signaling pathway(B)                                                         | 0.0016                                            | 17     | 2   | 2.54E-04 | 5.50E-03 | PRKCB, NOS1                                 |                         |
|                            | Circadian entrainment(K)                                                                  | 0.0088                                            | 96     | 3   | 2.90E-04 | 5.50E-03 | CAMK2B, PRKCB, NOS1                         |                         |
|                            | vegf hypoxia and angiogenesis(B)                                                          | 0.0026                                            | 28     | 2   | 6.82E-04 | 0.0116   | PRKCB, NOS1                                 |                         |
|                            | Calcium signaling pathway(K)                                                              | 0.0167                                            | 182    | 3   | 1.84E-03 | 0.0294   | CAMK2B, GABBR1, GRM3                        |                         |
|                            | cAMP signaling pathway(K)                                                                 | 0.0184                                            | 200    | 3   | 2.40E-03 | 0.0336   | CAMK2B, GABBR2, GABBR1                      |                         |
|                            | Long-term depression(K)                                                                   | 0.0055                                            | 60     | 2   | 3.05E-03 | 0.0389   | PRKCB, NOS1                                 |                         |
|                            | Synaptic vesicle cycle(K)                                                                 | 0.0058                                            | 63     | 2   | 3.36E-03 | 0.0389   | UNC13B, SYT1                                |                         |
|                            | Glioma(K)                                                                                 | 0.0061                                            | 66     | 2   | 3.67E-03 | 0.0389   | CAMK2B, PRKCB                               |                         |
|                            | Long-term potentiation(K)                                                                 | 0.0062                                            | 67     | 2   | 3.78E-03 | 0.0389   | CAMK2B, PRKCB                               |                         |
|                            | Amphetamine addiction(K)                                                                  | 0.0063                                            | 68     | 2   | 3.89E-03 | 0.0389   | CAMK2B, PRKCB                               |                         |
|                            | Gastric acid secretion(K)                                                                 | 0.0069                                            | 75     | 2   | 4.71E-03 | 0.042    | CAMK2B, PRKCB                               |                         |
|                            | Aldosterone synthesis and secretion(K)                                                    | 0.0075                                            | 82     | 2   | 5.60E-03 | 0.042    | CAMK2B, PRKCB                               |                         |
|                            | Taste transduction(K)                                                                     | 0.0076                                            | 83     | 2   | 5.73E-03 | 0.042    | GABBR2, GABBR1                              |                         |
|                            | Insulin secretion(K)                                                                      | 0.0078                                            | 85     | 2   | 6.00E-03 | 0.042    | CAMK2B, PRKCB                               |                         |
|                            | Neuroactive ligand-receptor interaction(K)                                                | 0.0256                                            | 278    | 3   | 6.05E-03 | 0.042    | GABBR2, GABBR1, GRM3                        |                         |
|                            | Potassium Channels(R)                                                                     | 0.008                                             | 87     | 2   | 6.28E-03 | 0.042    | GABBR2, GABBR1                              |                         |
|                            | ErbB signaling pathway(K)                                                                 | 0.0081                                            | 88     | 2   | 6.42E-03 | 0.042    | CAMK2B, PRKCB                               |                         |
|                            | Salivary secretion(K)                                                                     | 0.0083                                            | 90     | 2   | 6.70E-03 | 0.042    | PRKCB, NOS1                                 |                         |
|                            | GnRH signaling pathway(K)                                                                 | 0.0085                                            | 92     | 2   | 6.99E-03 | 0.042    | CAMK2B, PRKCB                               |                         |
|                            | Inflammatory mediator regulation of TRP channels(K)                                       | 0.0091                                            | 99     | 2   | 8.05E-03 | 0.0435   | CAMK2B, PRKCB                               |                         |
|                            | Estrogen signaling pathway(K)                                                             | 0.0092                                            | 100    | 2   | 8.21E-03 | 0.0435   | GABBR2, GABBR1                              |                         |
|                            | Melanogenesis(K)                                                                          | 0.0093                                            | 101    | 2   | 8.37E-03 | 0.0435   | CAMK2B, PRKCB                               |                         |
|                            | HIF-1 signaling pathway(K)                                                                | 0.0095                                            | 103    | 2   | 8.69E-03 | 0.0435   | CAMK2B, PRKCB                               |                         |
|                            | Cardiac conduction(R)                                                                     | 0.0098                                            | 107    | 2   | 9.35E-03 | 0.0467   | CAMK2B, NOS1                                |                         |
|                            | Heterotrimeric G-protein signaling pathway-Gq alpha and Go alpha mediated pathway(P)      | 0.0099                                            | 108    | 2   | 9.52E-03 | 0.0476   | PRKCB, GRM3                                 |                         |
|                            | cbl mediated ligand-induced downregulation of egf receptors pathway(B)                    | 0.0006                                            | 7      | 1   | 9.62E-03 | 0.0481   | PRKCB                                       |                         |
|                            | <b>La</b>                                                                                 | RAB GEFs exchange GTP for GDP on RABs(R)          | 0.0067 | 73  | 3        | 3.00E-06 | 2.10E-05                                    | RAB3GAP2, CHM, RAB3GAP1 |
|                            |                                                                                           | RAB geranylgeranylation(R)                        | 0.0014 | 15  | 2        | 1.90E-05 | 5.70E-05                                    | CHM, RABGGTB            |
|                            |                                                                                           | Intra-Golgi and retrograde Golgi-to-ER traffic(R) | 0.013  | 141 | 2        | 1.64E-03 | 3.28E-03                                    | RAB3GAP2, RAB3GAP1      |
|                            |                                                                                           | Effects of Botulinum toxin(N)                     | 0.0008 | 9   | 1        | 4.13E-03 | 4.13E-03                                    | RAB3GAP2                |
|                            |                                                                                           | Signaling events mediated by PRL(N)               | 0.0021 | 23  | 1        | 0.0105   | 0.0105                                      | RABGGTB                 |
|                            |                                                                                           | Generic Transcription Pathway(R)                  | 0.0455 | 494 | 2        | 0.0188   | 0.0188                                      | CHM, RABGGTB            |
| Sphingolipid metabolism(R) |                                                                                           | 0.0065                                            | 71     | 1   | 0.0322   | 0.0322   | VAPB                                        |                         |
| <b>Gy</b>                  | SNARE interactions in vesicular transport(K)                                              | 0.0031                                            | 34     | 2   | 9.73E-05 | 1.75E-03 | STX5, STX2                                  |                         |
|                            | Hippo signaling pathway(K)                                                                | 0.0142                                            | 154    | 2   | 1.95E-03 | 0.0176   | DLG1, SCRIB                                 |                         |
|                            | Viral carcinogenesis(K)                                                                   | 0.0187                                            | 203    | 2   | 3.36E-03 | 0.0202   | DLG1, SCRIB                                 |                         |
|                            | SALM protein interactions at the synapses(R)                                              | 0.0018                                            | 20     | 1   | 9.17E-03 | 0.0318   | DLG1                                        |                         |
|                            | E-cadherin signaling in the nascent adherens junction(N)                                  | 0.0033                                            | 36     | 1   | 0.0165   | 0.0318   | DLG1                                        |                         |
|                            | Neurotransmitter Release Cycle(R)                                                         | 0.0037                                            | 40     | 1   | 0.0183   | 0.0318   | APBA1                                       |                         |
|                            | Interactions of neuroligins and neuroligins at synapses(R)                                | 0.0046                                            | 50     | 1   | 0.0228   | 0.0318   | APBA1                                       |                         |
|                            | Alzheimer disease-amyloid secretase pathway(P)                                            | 0.0054                                            | 59     | 1   | 0.0269   | 0.0318   | APBA1                                       |                         |
|                            | Synaptic vesicle cycle(K)                                                                 | 0.0058                                            | 63     | 1   | 0.0287   | 0.0318   | STX2                                        |                         |
|                            | CDC42 signaling events(N)                                                                 | 0.0064                                            | 70     | 1   | 0.0318   | 0.0318   | DLG1                                        |                         |
|                            | L1CAM interactions(R)                                                                     | 0.0075                                            | 82     | 1   | 0.0372   | 0.0372   | DLG1                                        |                         |
|                            | T cell receptor signaling pathway(K)                                                      | 0.0097                                            | 105    | 1   | 0.0474   | 0.0474   | DLG1                                        |                         |

| Module (dev'tal) | Pathway                                                       | Ratio of protein in Gene Set | No. of proteins in geneset | Protein frm (>3) | P-value (<0.05) | FDR (<0.05) | Nodes                                                              |
|------------------|---------------------------------------------------------------|------------------------------|----------------------------|------------------|-----------------|-------------|--------------------------------------------------------------------|
| <b>Re</b>        | Synaptic vesicle cycle(K)                                     | 0.0058                       | 63                         | 8                | 1.55E-15        | 7.93E-14    | ATP6V1A, ATP6V0B, STXBP1, STX1B, AP2S1, ATP6V1E1, ATP6V0C, ATP6V1D |
|                  | ROS, RNS production in phagocytes(R)                          | 0.0029                       | 32                         | 5                | 2.79E-10        | 6.99E-09    | ATP6V1A, ATP6V0B, ATP6V1E1, ATP6V0C, ATP6V1D                       |
|                  | Iron uptake and transport(R)                                  | 0.0035                       | 38                         | 5                | 6.57E-10        | 1.12E-08    | ATP6V1A, ATP6V0B, ATP6V1E1, ATP6V0C, ATP6V1D                       |
|                  | Vibrio cholerae infection(K)                                  | 0.0047                       | 51                         | 5                | 2.84E-09        | 3.41E-08    | ATP6V1A, ATP6V0B, ATP6V1E1, ATP6V0C, ATP6V1D                       |
|                  | Epithelial cell signaling in Helicobacter pylori infection(K) | 0.0063                       | 68                         | 5                | 1.18E-08        | 1.18E-07    | ATP6V1A, ATP6V0B, ATP6V1E1, ATP6V0C, ATP6V1D                       |
|                  | Rheumatoid arthritis(K)                                       | 0.0083                       | 90                         | 5                | 4.74E-08        | 3.32E-07    | ATP6V1A, ATP6V0B, ATP6V1E1, ATP6V0C, ATP6V1D                       |
|                  | Oxidative phosphorylation(K)                                  | 0.0122                       | 133                        | 5                | 3.26E-07        | 1.95E-06    | ATP6V1A, ATP6V0B, ATP6V1E1, ATP6V0C, ATP6V1D                       |
|                  | Phagosome(K)                                                  | 0.0142                       | 154                        | 5                | 6.69E-07        | 3.34E-06    | ATP6V1A, ATP6V0B, ATP6V1E1, ATP6V0C, ATP6V1D                       |
|                  | Ion channel transport(R)                                      | 0.0156                       | 169                        | 5                | 1.05E-06        | 5.27E-06    | ATP6V1A, ATP6V0B, ATP6V1E1, ATP6V0C, ATP6V1D                       |
|                  | Signaling by Insulin receptor(R)                              | 0.0255                       | 277                        | 5                | 1.17E-05        | 4.67E-05    | ATP6V1A, ATP6V0B, ATP6V1E1, ATP6V0C, ATP6V1D                       |
|                  | Metabolic pathways(K)                                         | 0.1165                       | 1266                       | 5                | 0.0123          | 0.0188      | ATP6V1A, ATP6V0B, ATP6V1E1, ATP6V0C, ATP6V1D                       |
|                  | Collecting duct acid secretion(K)                             | 0.0025                       | 27                         | 4                | 2.68E-08        | 2.14E-07    | ATP6V1A, ATP6V1E1, ATP6V0C, ATP6V1D                                |
|                  | SNARE interactions in vesicular transport(K)                  | 0.0031                       | 34                         | 3                | 8.56E-06        | 3.42E-05    | STX16, VAMP8, STX1B                                                |
|                  | Intra-Golgi and retrograde Golgi-to-ER traffic(R)             | 0.013                        | 141                        | 3                | 5.67E-04        | 1.70E-03    | STX16, RAB3GAP2, RAB3GAP1                                          |
|                  | mTOR signaling pathway(K)                                     | 0.0142                       | 154                        | 3                | 7.32E-04        | 2.20E-03    | ATP6V1A, ATP6V1E1, ATP6V1D                                         |

|    |                                                                                           |        |     |    |          |          |                                                                                                                                |
|----|-------------------------------------------------------------------------------------------|--------|-----|----|----------|----------|--------------------------------------------------------------------------------------------------------------------------------|
|    | Neutrophil degranulation(R)                                                               | 0.0362 | 393 | 3  | 0.0103   | 0.0188   | VAMP8,ATP6V0C,ATP6V1D                                                                                                          |
|    | Effects of Botulinum toxin(N)                                                             | 0.0008 | 9   | 2  | 5.32E-05 | 1.60E-04 | STXBP1,RAB3GAP2                                                                                                                |
|    | Synaptic vesicle trafficking(P)                                                           | 0.0012 | 13  | 2  | 1.11E-04 | 3.32E-04 | STXBP1,STX1B                                                                                                                   |
|    | RAB GEFs exchange GTP for GDP on RABs(R)                                                  | 0.0067 | 73  | 2  | 3.35E-03 | 0.0101   | RAB3GAP2,RAB3GAP1                                                                                                              |
|    | Clathrin-mediated endocytosis(R)                                                          | 0.0108 | 117 | 2  | 8.36E-03 | 0.0167   | VAMP8,AP2S1                                                                                                                    |
|    | Lysosome(K)                                                                               | 0.0113 | 123 | 2  | 9.20E-03 | 0.0184   | ATP6V0B,ATP6V0C                                                                                                                |
|    | Tuberculosis(K)                                                                           | 0.0165 | 179 | 2  | 0.0188   | 0.0188   | ATP6V0B,ATP6V0C                                                                                                                |
|    | Metabotropic glutamate receptor group III pathway(P)                                      | 0.0006 | 6   | 1  | 7.15E-03 | 0.0143   | STX1B                                                                                                                          |
|    | Metabotropic glutamate receptor group II pathway(P)                                       | 0.0008 | 9   | 1  | 0.0107   | 0.0188   | STX1B                                                                                                                          |
|    | 5HT3 type receptor mediated signaling pathway(P)                                          | 0.0009 | 10  | 1  | 0.0119   | 0.0188   | VAMP8                                                                                                                          |
|    | LGI-ADAM interactions(R)                                                                  | 0.0013 | 14  | 1  | 0.0166   | 0.0188   | STX1B                                                                                                                          |
|    | Beta2 adrenergic receptor signaling pathway(P)                                            | 0.0019 | 21  | 1  | 0.0248   | 0.0248   | VAMP8                                                                                                                          |
|    | Beta3 adrenergic receptor signaling pathway(P)                                            | 0.0019 | 21  | 1  | 0.0248   | 0.0248   | VAMP8                                                                                                                          |
|    | Oxytocin receptor mediated signaling pathway(P)                                           | 0.0019 | 21  | 1  | 0.0248   | 0.0248   | VAMP8                                                                                                                          |
|    | 5HT4 type receptor mediated signaling pathway(P)                                          | 0.0021 | 23  | 1  | 0.0272   | 0.0272   | VAMP8                                                                                                                          |
|    | Corticotropin releasing factor receptor signaling pathway(P)                              | 0.0023 | 25  | 1  | 0.0295   | 0.0295   | VAMP8                                                                                                                          |
|    | 5HT2 type receptor mediated signaling pathway(P)                                          | 0.0024 | 26  | 1  | 0.0307   | 0.0307   | VAMP8                                                                                                                          |
|    | Beta1 adrenergic receptor signaling pathway(P)                                            | 0.0025 | 27  | 1  | 0.0318   | 0.0318   | VAMP8                                                                                                                          |
|    | Neurotransmitter Release Cycle(R)                                                         | 0.0037 | 40  | 1  | 0.0468   | 0.0468   | STXBP1                                                                                                                         |
| Go | Neurotransmitter Release Cycle(R)                                                         | 0.0037 | 40  | 3  | 1.39E-05 | 1.71E-03 | SYT1,DNAJC5,APBA1                                                                                                              |
| Or | Synaptic vesicle cycle(K)                                                                 | 0.0058 | 63  | 20 | 1.11E-16 | 3.04E-14 | NAPA,SNAP25,STXBP1,CLTC,CLTB,AP2A2,ATP6V1H,SLC17A6,SLC17A7,STX2,AP2M1,ATP6V1C1,NSF,UNC13B,AP2B1,DNM1,DNM2,STX1B,STX1A,ATP6V1B1 |
|    | Endocytosis(K)                                                                            | 0.0239 | 260 | 11 | 1.33E-09 | 7.36E-08 | CLTC,CLTB,AP2A2,AP2M1,AP2B1,EPN1,DNM1,RAB11B,DNM2,EPN2,RAB7A                                                                   |
|    | Clathrin-mediated endocytosis(R)                                                          | 0.0108 | 117 | 10 | 1.00E-11 | 9.11E-10 | CLTC,CLTB,AP2A2,AP2M1,AP2B1,EPN1,DNM2,EPN2,CTTN,SYNJ1                                                                          |
|    | Endocrine and other factor-regulated calcium reabsorption(K)                              | 0.0043 | 47  | 8  | 6.69E-12 | 9.11E-10 | CLTC,CLTB,AP2A2,AP2M1,PRKCB,AP2B1,DNM1,DNM2                                                                                    |
|    | Bacterial invasion of epithelial cells(K)                                                 | 0.0072 | 78  | 7  | 1.23E-08 | 5.55E-07 | CLTC,CLTB,CDH1,CTNNA1,DNM1,DNM2,CTTN                                                                                           |
|    | Neurotransmitter Receptor Binding And Downstream Transmission In The Postsynaptic Cell(R) | 0.0123 | 134 | 7  | 4.72E-07 | 1.41E-05 | CAMK2B,AP2A2,AP2M1,NSF,GABBR1,PRKCB,AP2B1                                                                                      |
|    | MHC class II antigen presentation(R)                                                      | 0.0082 | 89  | 6  | 7.81E-07 | 2.11E-05 | CLTC,AP2A2,AP2M1,AP2B1,DNM2,RAB7A                                                                                              |
|    | Signalling by NGF(R)                                                                      | 0.0387 | 421 | 6  | 3.67E-03 | 0.0208   | CAMK2B,CLTC,AP2A2,SYNGAP1,AP2M1,AP2B1                                                                                          |
|    | Synaptic vesicle trafficking(P)                                                           | 0.0012 | 13  | 5  | 1.36E-09 | 7.36E-08 | SNAP25,STXBP1,UNC13B,STX1B,STX1A                                                                                               |
|    | Neurotransmitter Release Cycle(R)                                                         | 0.0037 | 40  | 5  | 3.51E-07 | 1.19E-05 | SNAP25,STXBP1,SLC17A7,UNC13B,STX1A                                                                                             |
|    | Phagosome(K)                                                                              | 0.0142 | 154 | 5  | 2.20E-04 | 3.34E-03 | STX12,ATP6V1H,ATP6V1C1,RAB7A,ATP6V1B1                                                                                          |
|    | Ion channel transport(R)                                                                  | 0.0156 | 169 | 5  | 3.37E-04 | 3.37E-03 | CAMK2B,ATP6V1H,ATP6V1C1,ATP2B2,ATP6V1B1                                                                                        |
|    | Huntington's disease(K)                                                                   | 0.0178 | 193 | 5  | 6.15E-04 | 4.92E-03 | CLTC,CLTB,AP2A2,AP2M1,AP2B1                                                                                                    |
|    | Signaling by Insulin receptor(R)                                                          | 0.0255 | 277 | 5  | 3.01E-03 | 0.0181   | CAMK2B,SYNGAP1,ATP6V1H,ATP6V1C1,ATP6V1B1                                                                                       |
|    | Effects of Botulinum toxin(N)                                                             | 0.0008 | 9   | 4  | 3.78E-08 | 1.47E-06 | SNAP25,STXBP1,UNC13B,STX1A                                                                                                     |
|    | Arf6 trafficking events(N)                                                                | 0.0031 | 34  | 4  | 7.22E-06 | 1.59E-04 | CLTC,CDH1,CTNNA1,DNM2                                                                                                          |
|    | SNARE interactions in vesicular transport(K)                                              | 0.0031 | 34  | 4  | 7.22E-06 | 1.59E-04 | STX16,STX2,STX1B,STX1A                                                                                                         |
|    | Posttranslational regulation of adherens junction stability and disassembly(N)            | 0.0044 | 48  | 4  | 2.77E-05 | 5.26E-04 | CDH1,CTNNA1,DNM2,RAB7A                                                                                                         |
|    | L1CAM interactions(R)                                                                     | 0.0075 | 82  | 4  | 2.16E-04 | 3.34E-03 | CLTC,AP2A2,AP2M1,AP2B1                                                                                                         |
|    | Insulin secretion(K)                                                                      | 0.0078 | 85  | 4  | 2.47E-04 | 3.34E-03 | CAMK2B,SNAP25,PRKCB,STX1A                                                                                                      |
|    | EPH-Ephrin signaling(R)                                                                   | 0.0082 | 89  | 4  | 2.94E-04 | 3.34E-03 | AP2A2,AP2M1,AP2B1,DNM1                                                                                                         |
|    | Lipid digestion, mobilization, and transport(R)                                           | 0.0084 | 91  | 4  | 3.20E-04 | 3.37E-03 | CLTC,AP2A2,AP2M1,AP2B1                                                                                                         |
|    | Heterotrimeric G-protein signaling pathway-Gq alpha and Go alpha mediated pathway(P)      | 0.0099 | 108 | 4  | 6.08E-04 | 4.92E-03 | CLTC,CLTB,GRM3,PRKCB                                                                                                           |
|    | Beta-catenin independent WNT signaling(R)                                                 | 0.0103 | 112 | 4  | 6.96E-04 | 5.57E-03 | CLTC,AP2A2,AP2M1,AP2B1                                                                                                         |
|    | Glutamatergic synapse(K)                                                                  | 0.0105 | 114 | 4  | 7.43E-04 | 5.94E-03 | GRM3,SLC17A6,SLC17A7,PRKCB                                                                                                     |
|    | mTOR signaling pathway(K)                                                                 | 0.0142 | 154 | 4  | 2.23E-03 | 0.0134   | ATP6V1H,ATP6V1C1,PRKCB,ATP6V1B1                                                                                                |
|    | endocytotic role of ndk phosphins and dynamin(B)                                          | 0.0012 | 13  | 3  | 1.51E-05 | 3.18E-04 | AP2M1,EPN1,SYNJ1                                                                                                               |
|    | ROS, RNS production in phagocytes(R)                                                      | 0.0029 | 32  | 3  | 2.16E-04 | 3.34E-03 | ATP6V1H,ATP6V1C1,ATP6V1B1                                                                                                      |
|    | IL8- and CXCR2-mediated signaling events(N)                                               | 0.0031 | 34  | 3  | 2.57E-04 | 3.34E-03 | PRKCB,DNM1,RAB7A                                                                                                               |
|    | Internalization of ErbB1(N)                                                               | 0.0032 | 35  | 3  | 2.80E-04 | 3.34E-03 | EPN1,DNM1,SYNJ1                                                                                                                |
|    | E-cadherin signaling in the nascent adherens junction(N)                                  | 0.0033 | 36  | 3  | 3.04E-04 | 3.34E-03 | CDH1,CTNNA1,CTTN                                                                                                               |
|    | Iron uptake and transport(R)                                                              | 0.0035 | 38  | 3  | 3.56E-04 | 3.56E-03 | ATP6V1H,ATP6V1C1,ATP6V1B1                                                                                                      |
|    | PAR1-mediated thrombin signaling events(N)                                                | 0.004  | 43  | 3  | 5.09E-04 | 4.58E-03 | PRKCB,DNM1,DNM2                                                                                                                |
|    | trans-Golgi Network Vesicle Budding(R)                                                    | 0.0041 | 45  | 3  | 5.80E-04 | 4.92E-03 | NAPA,CLTC,DNM2                                                                                                                 |
|    | Vibrio cholerae infection(K)                                                              | 0.0047 | 51  | 3  | 8.32E-04 | 6.66E-03 | ATP6V1H,ATP6V1C1,ATP6V1B1                                                                                                      |
|    | Signaling events mediated by VEGFR1 and VEGFR2(N)                                         | 0.0058 | 63  | 3  | 1.52E-03 | 0.0107   | CTNNA1,PRKCB,DNM2                                                                                                              |
|    | Epithelial cell signaling in Helicobacter pylori infection(K)                             | 0.0063 | 68  | 3  | 1.89E-03 | 0.0132   | ATP6V1H,ATP6V1C1,ATP6V1B1                                                                                                      |
|    | Amphetamine addiction(K)                                                                  | 0.0063 | 68  | 3  | 1.89E-03 | 0.0132   | CAMK2B,PRKCB,STX1A                                                                                                             |
|    | Adherens junction(K)                                                                      | 0.0066 | 72  | 3  | 2.22E-03 | 0.0134   | PTPRF,CDH1,CTNNA1                                                                                                              |
|    | GABAergic synapse(K)                                                                      | 0.0081 | 88  | 3  | 3.90E-03 | 0.0208   | NSF,GABBR1,PRKCB                                                                                                               |
|    | Rheumatoid arthritis(K)                                                                   | 0.0083 | 90  | 3  | 4.16E-03 | 0.0208   | ATP6V1H,ATP6V1C1,ATP6V1B1                                                                                                      |
|    | Integration of energy metabolism(R)                                                       | 0.0085 | 92  | 3  | 4.42E-03 | 0.0221   | SNAP25,STXBP1,STX1A                                                                                                            |
|    | Retrograde endocannabinoid signaling(K)                                                   | 0.0093 | 101 | 3  | 5.72E-03 | 0.0286   | SLC17A6,SLC17A7,PRKCB                                                                                                          |
|    | Lysosome(K)                                                                               | 0.0113 | 123 | 3  | 9.78E-03 | 0.0403   | CLTC,CLTB,ATP6V1H                                                                                                              |
|    | Oxidative phosphorylation(K)                                                              | 0.0122 | 133 | 3  | 0.0121   | 0.0483   | ATP6V1H,ATP6V1C1,ATP6V1B1                                                                                                      |
|    | Metabotropic glutamate receptor group III pathway(P)                                      | 0.0006 | 6   | 2  | 2.23E-04 | 3.34E-03 | STX1B,STX1A                                                                                                                    |
|    | Metabotropic glutamate receptor group II pathway(P)                                       | 0.0008 | 9   | 2  | 4.98E-04 | 4.58E-03 | STX1B,STX1A                                                                                                                    |
|    | LGI-ADAM interactions(R)                                                                  | 0.0013 | 14  | 2  | 1.19E-03 | 8.34E-03 | STX1B,STX1A                                                                                                                    |
|    | Arf1 pathway(N)                                                                           | 0.0018 | 20  | 2  | 2.40E-03 | 0.0144   | CLTB,AP2M1                                                                                                                     |
|    | E-cadherin signaling in keratinocytes(N)                                                  | 0.0019 | 21  | 2  | 2.64E-03 | 0.0158   | CDH1,CTNNA1                                                                                                                    |
|    | Collecting duct acid secretion(K)                                                         | 0.0025 | 27  | 2  | 4.30E-03 | 0.0215   | ATP6V1C1,ATP6V1B1                                                                                                              |
|    | IL8- and CXCR1-mediated signaling events(N)                                               | 0.0026 | 28  | 2  | 4.62E-03 | 0.0231   | PRKCB,DNM1                                                                                                                     |
|    | Nectin adhesion pathway(N)                                                                | 0.0028 | 30  | 2  | 5.28E-03 | 0.0264   | CDH1,CTNNA1                                                                                                                    |
|    | N-cadherin signaling events(N)                                                            | 0.003  | 33  | 2  | 6.34E-03 | 0.0317   | CTNNA1,CTTN                                                                                                                    |
|    | Nicotine addiction(K)                                                                     | 0.0037 | 40  | 2  | 9.17E-03 | 0.0403   | SLC17A6,SLC17A7                                                                                                                |
|    | TBC/RABGAPs(R)                                                                            | 0.0039 | 42  | 2  | 0.0101   | 0.0403   | RAB11B,RAB7A                                                                                                                   |
|    | Stabilization and expansion of the E-cadherin adherens junction(N)                        | 0.0039 | 42  | 2  | 0.0101   | 0.0403   | CDH1,CTNNA1                                                                                                                    |
|    | Vasopressin-regulated water reabsorption(K)                                               | 0.004  | 44  | 2  | 0.011    | 0.044    | NSF,RAB11B                                                                                                                     |
|    | FGF signaling pathway(N)                                                                  | 0.0043 | 47  | 2  | 0.0125   | 0.0499   | CDH1,CTTN                                                                                                                      |
|    | AlphaE beta7 integrin cell surface interactions(N)                                        | 0.0003 | 3   | 1  | 0.0107   | 0.0428   | CDH1                                                                                                                           |

Supplementary Fig. 1.

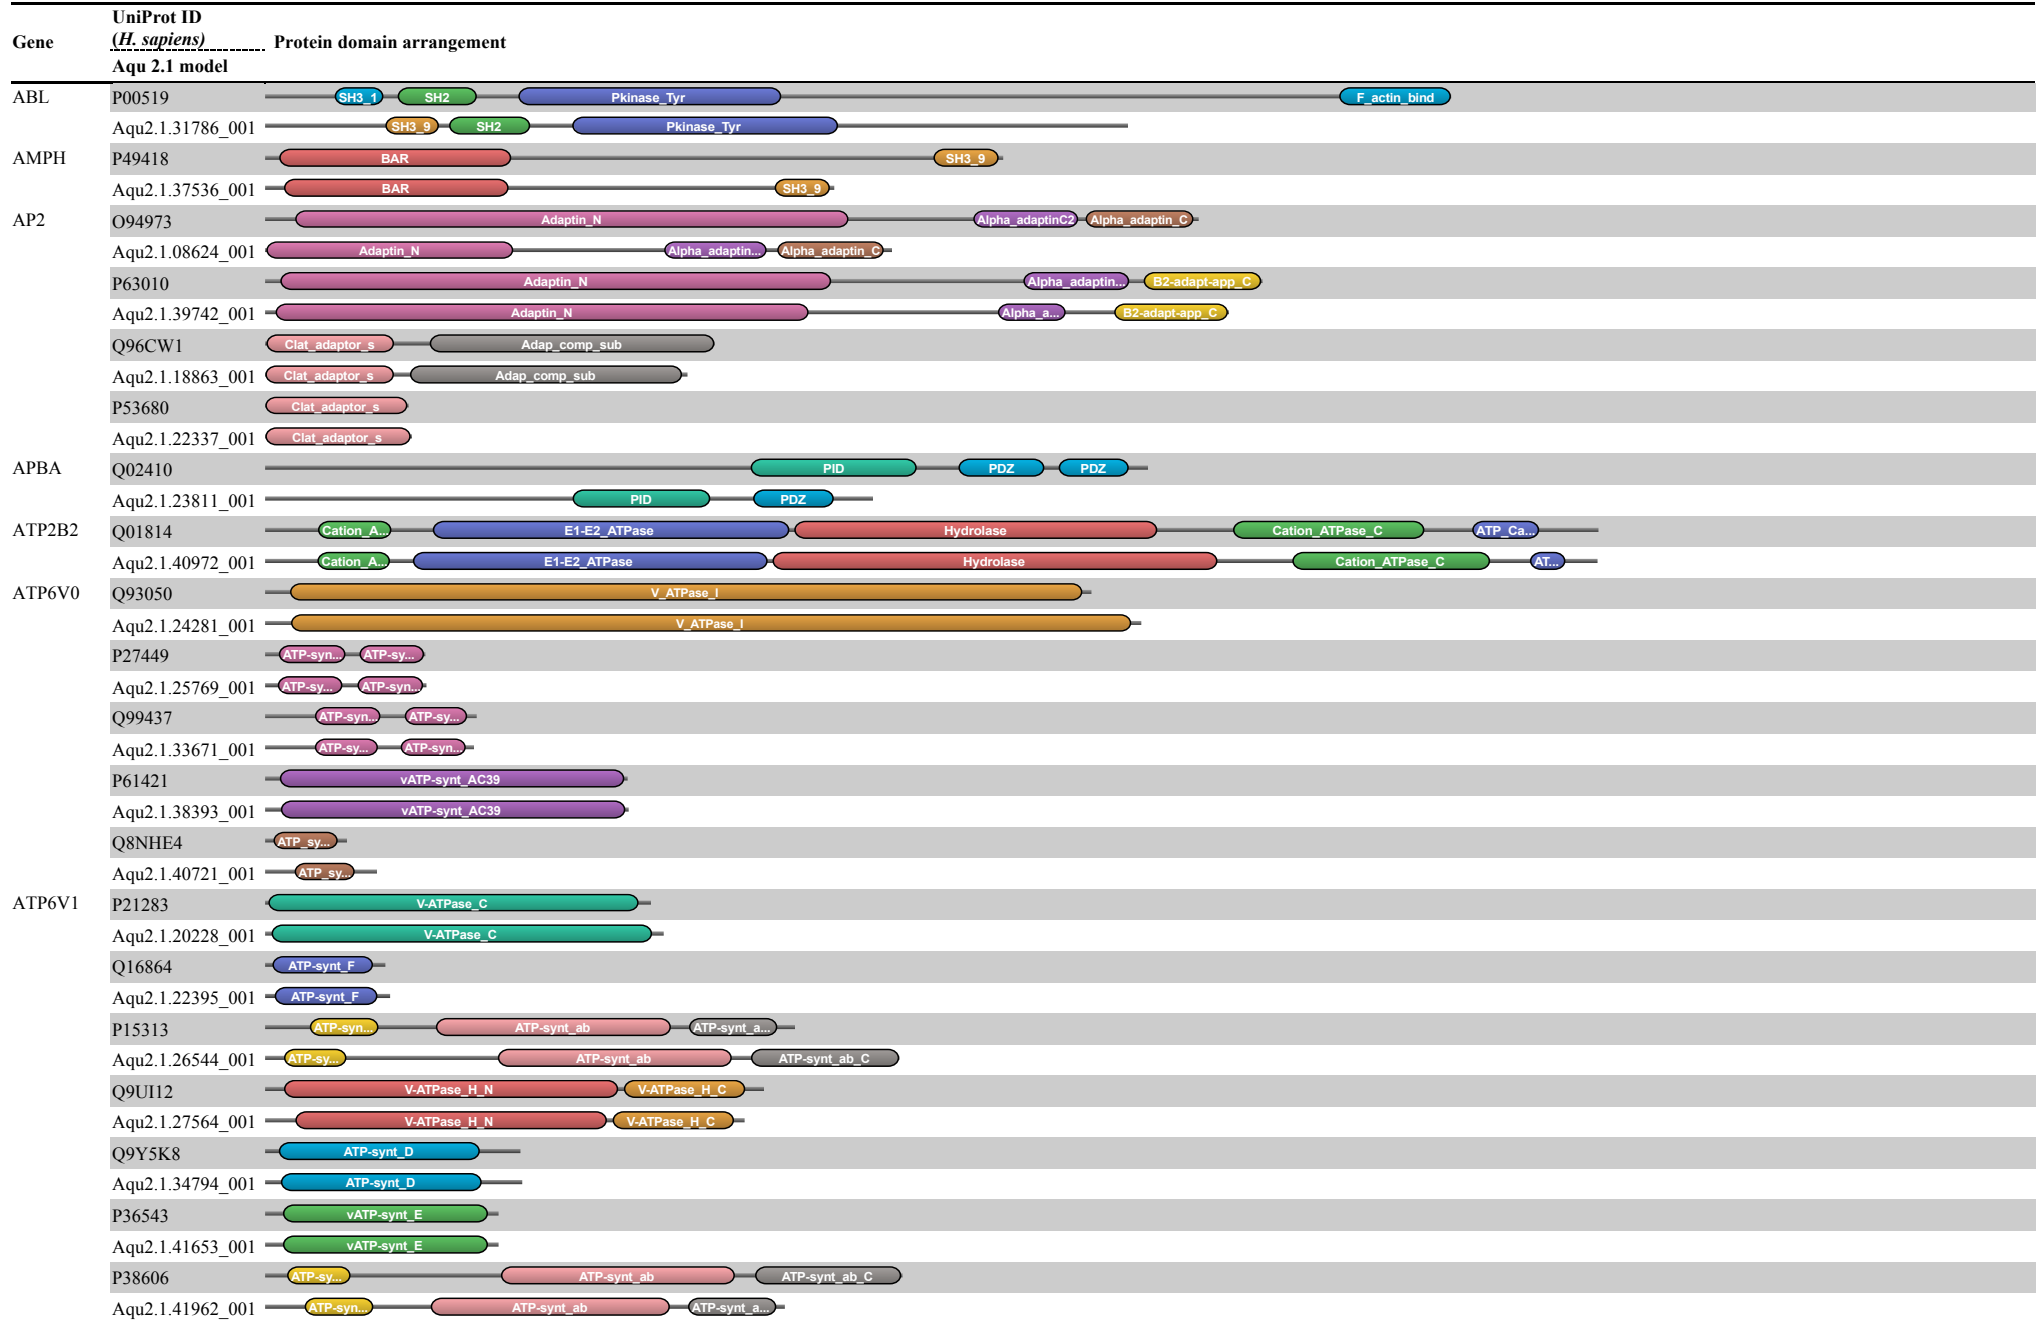

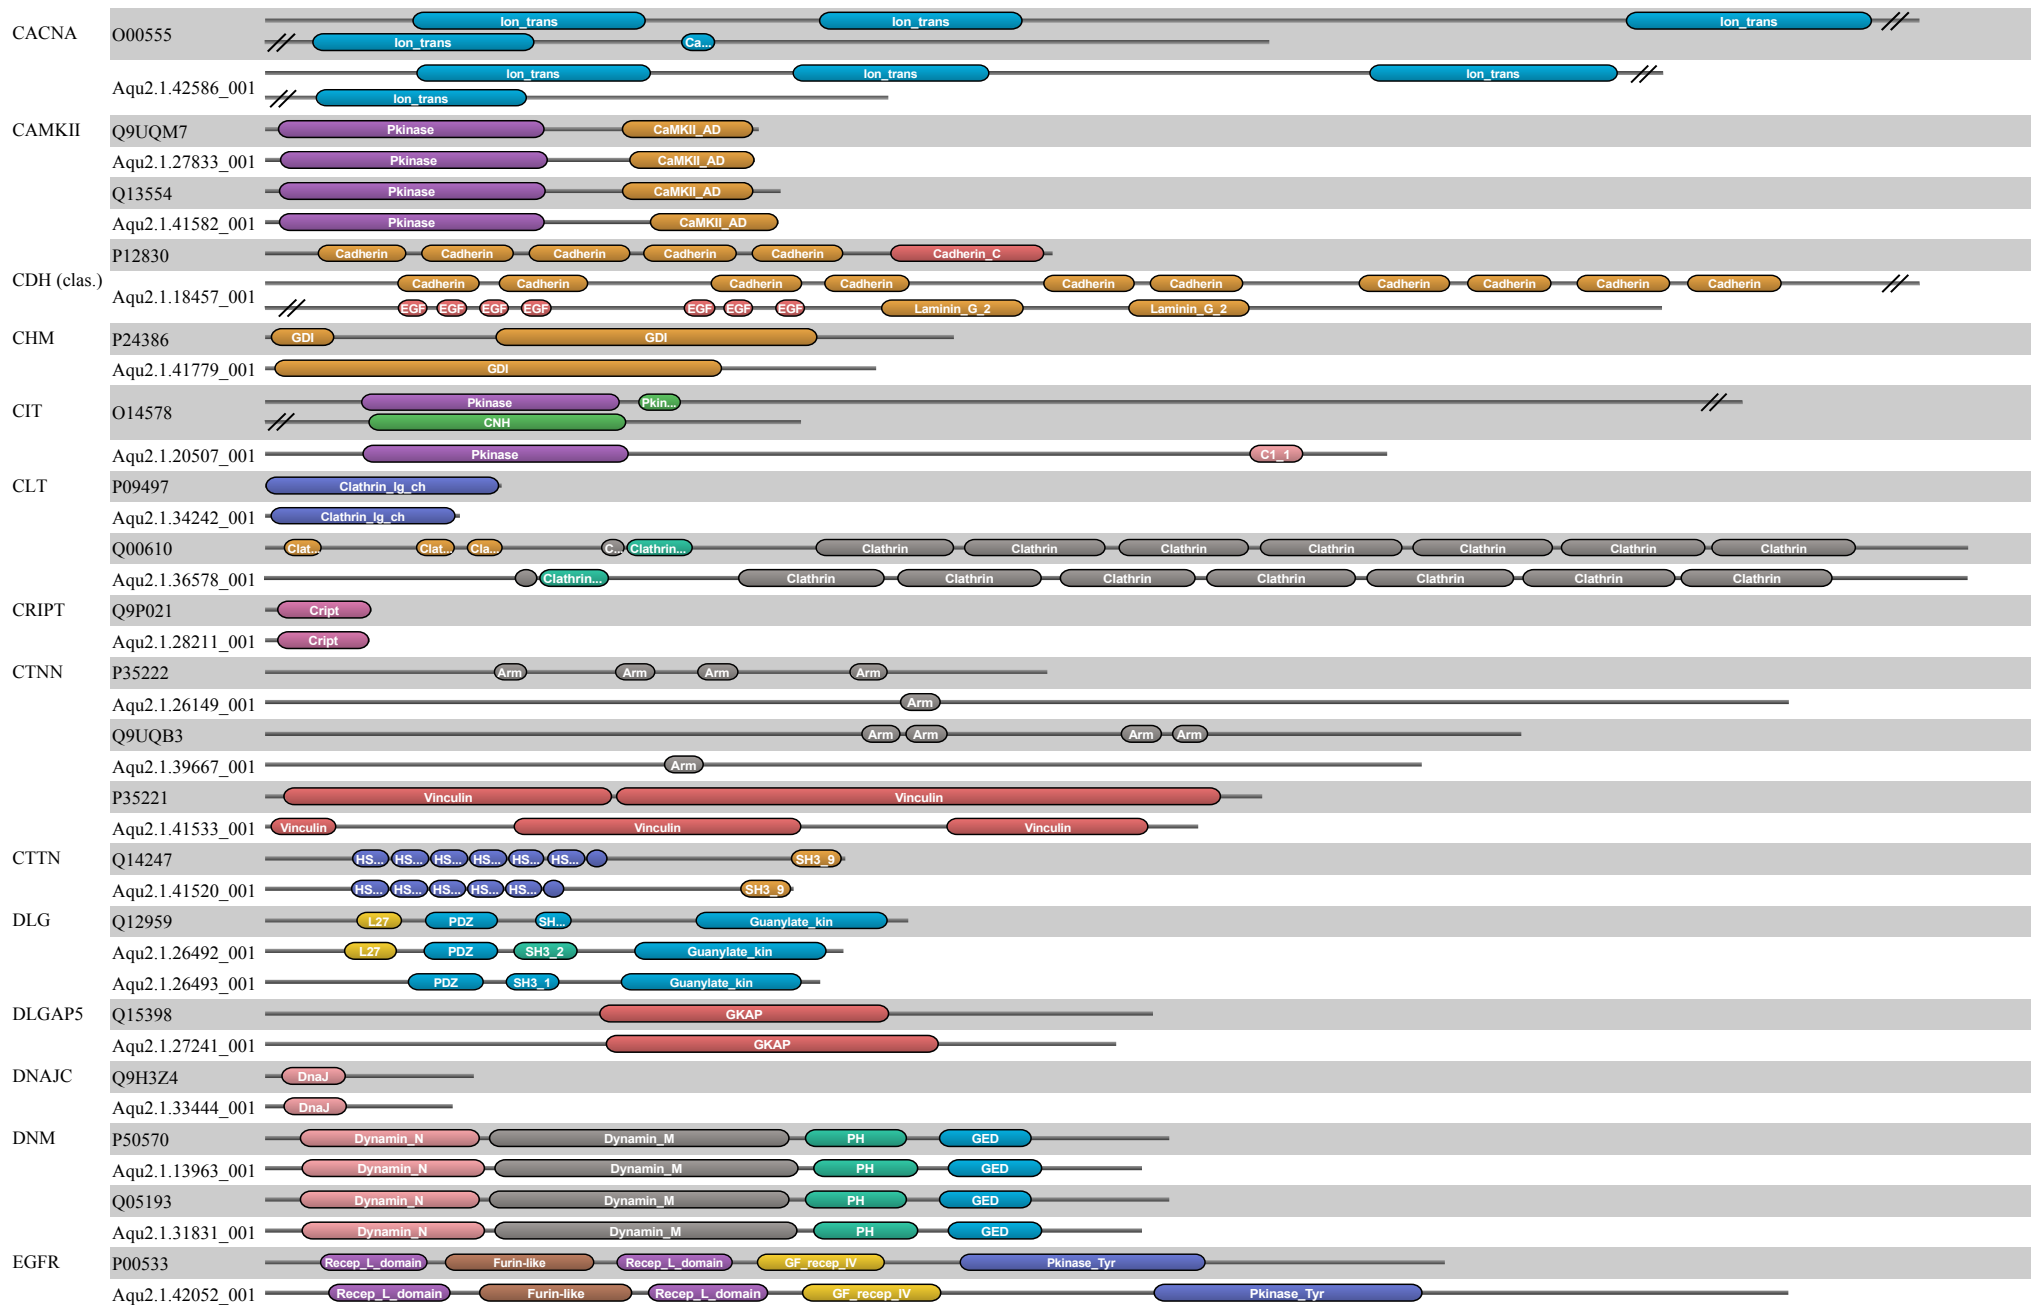



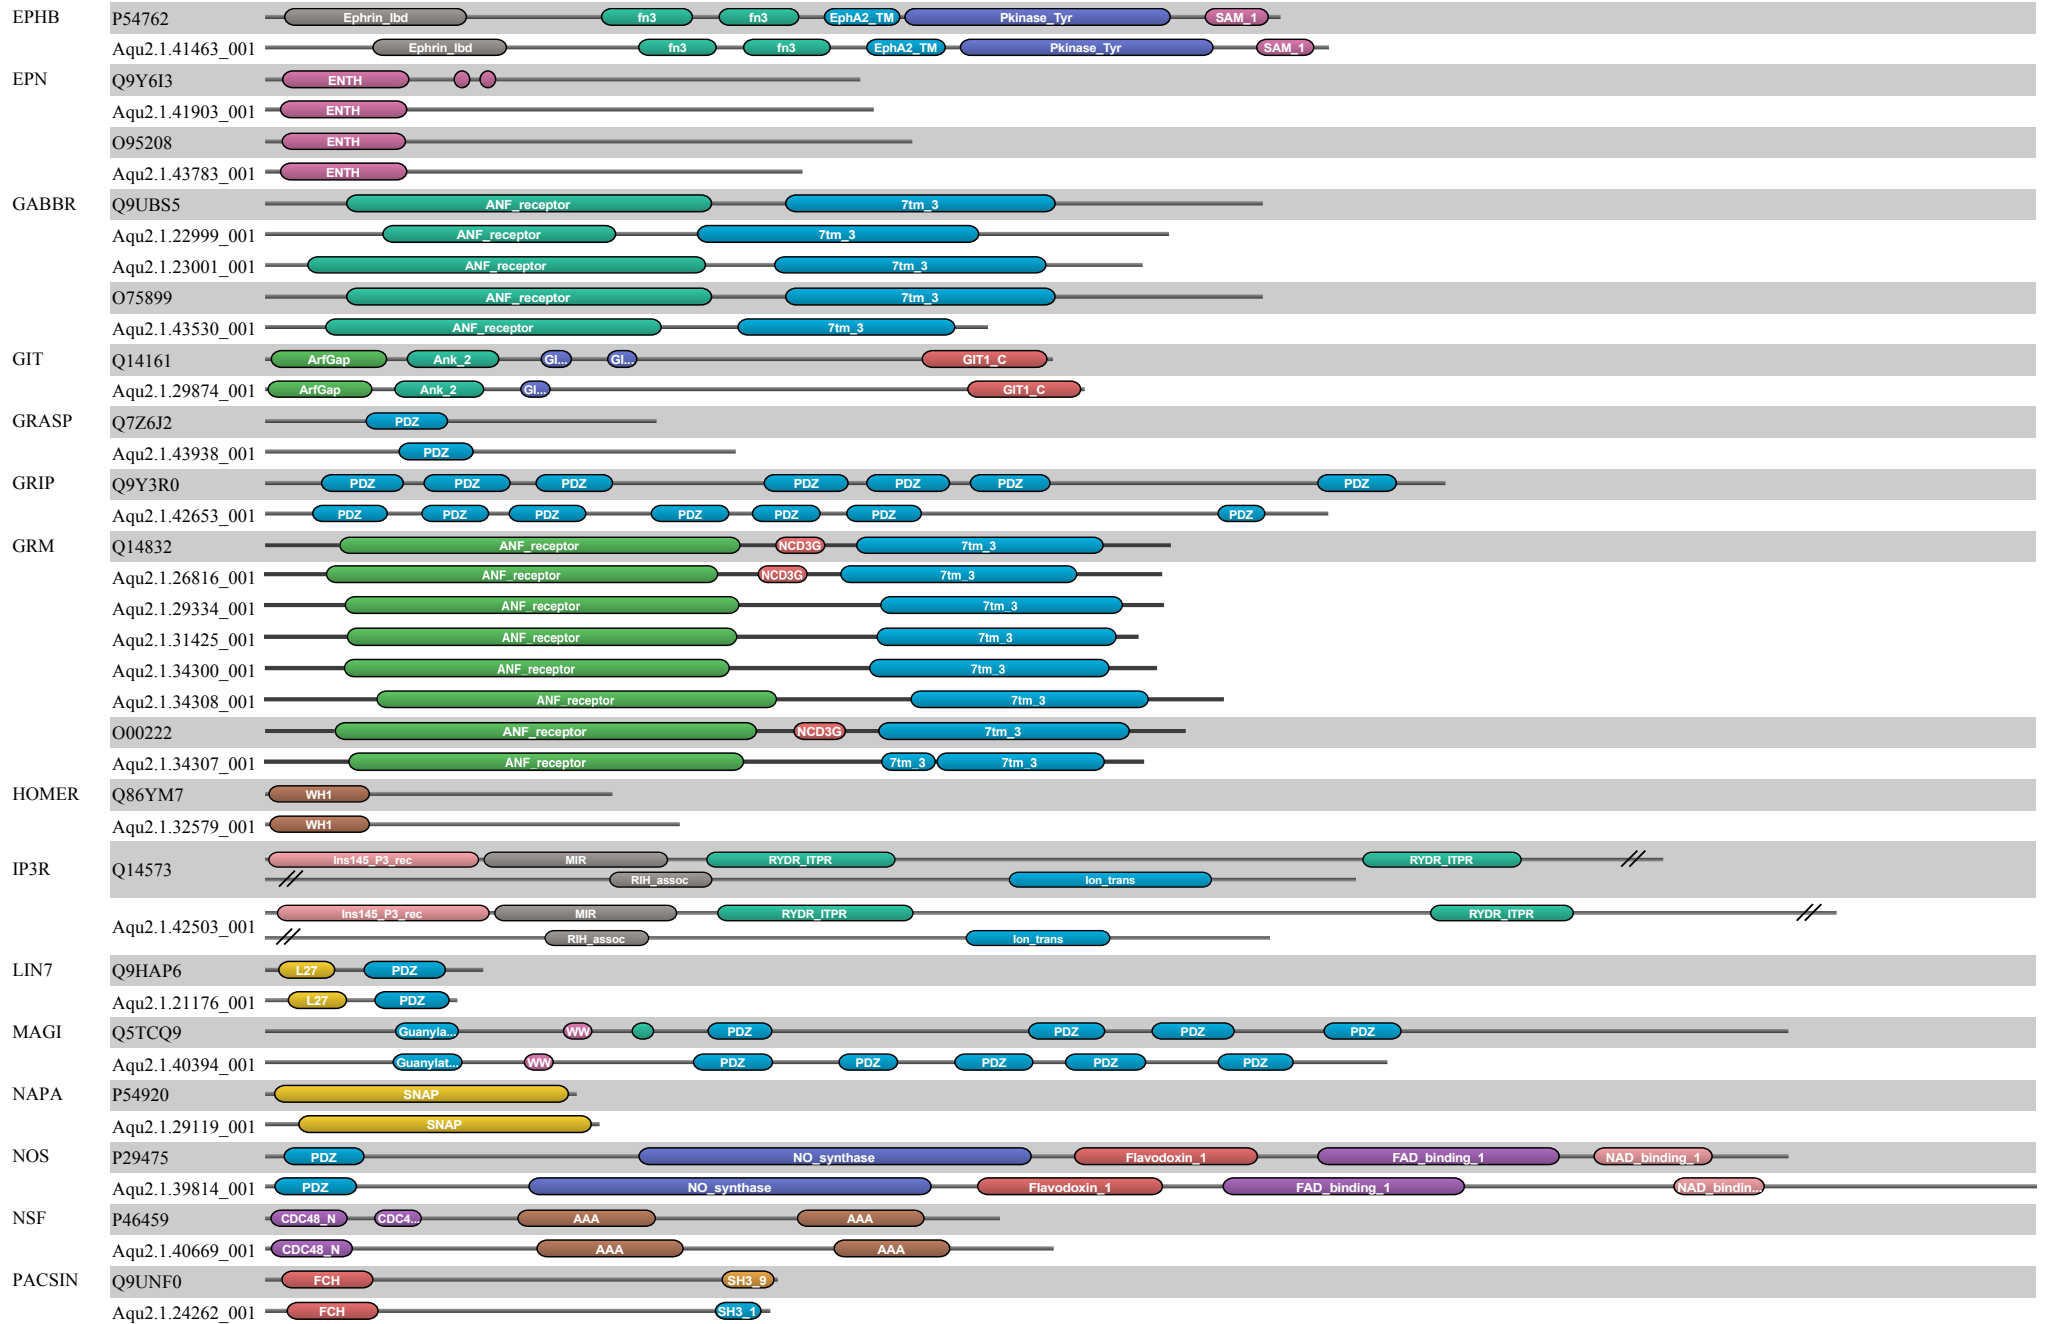

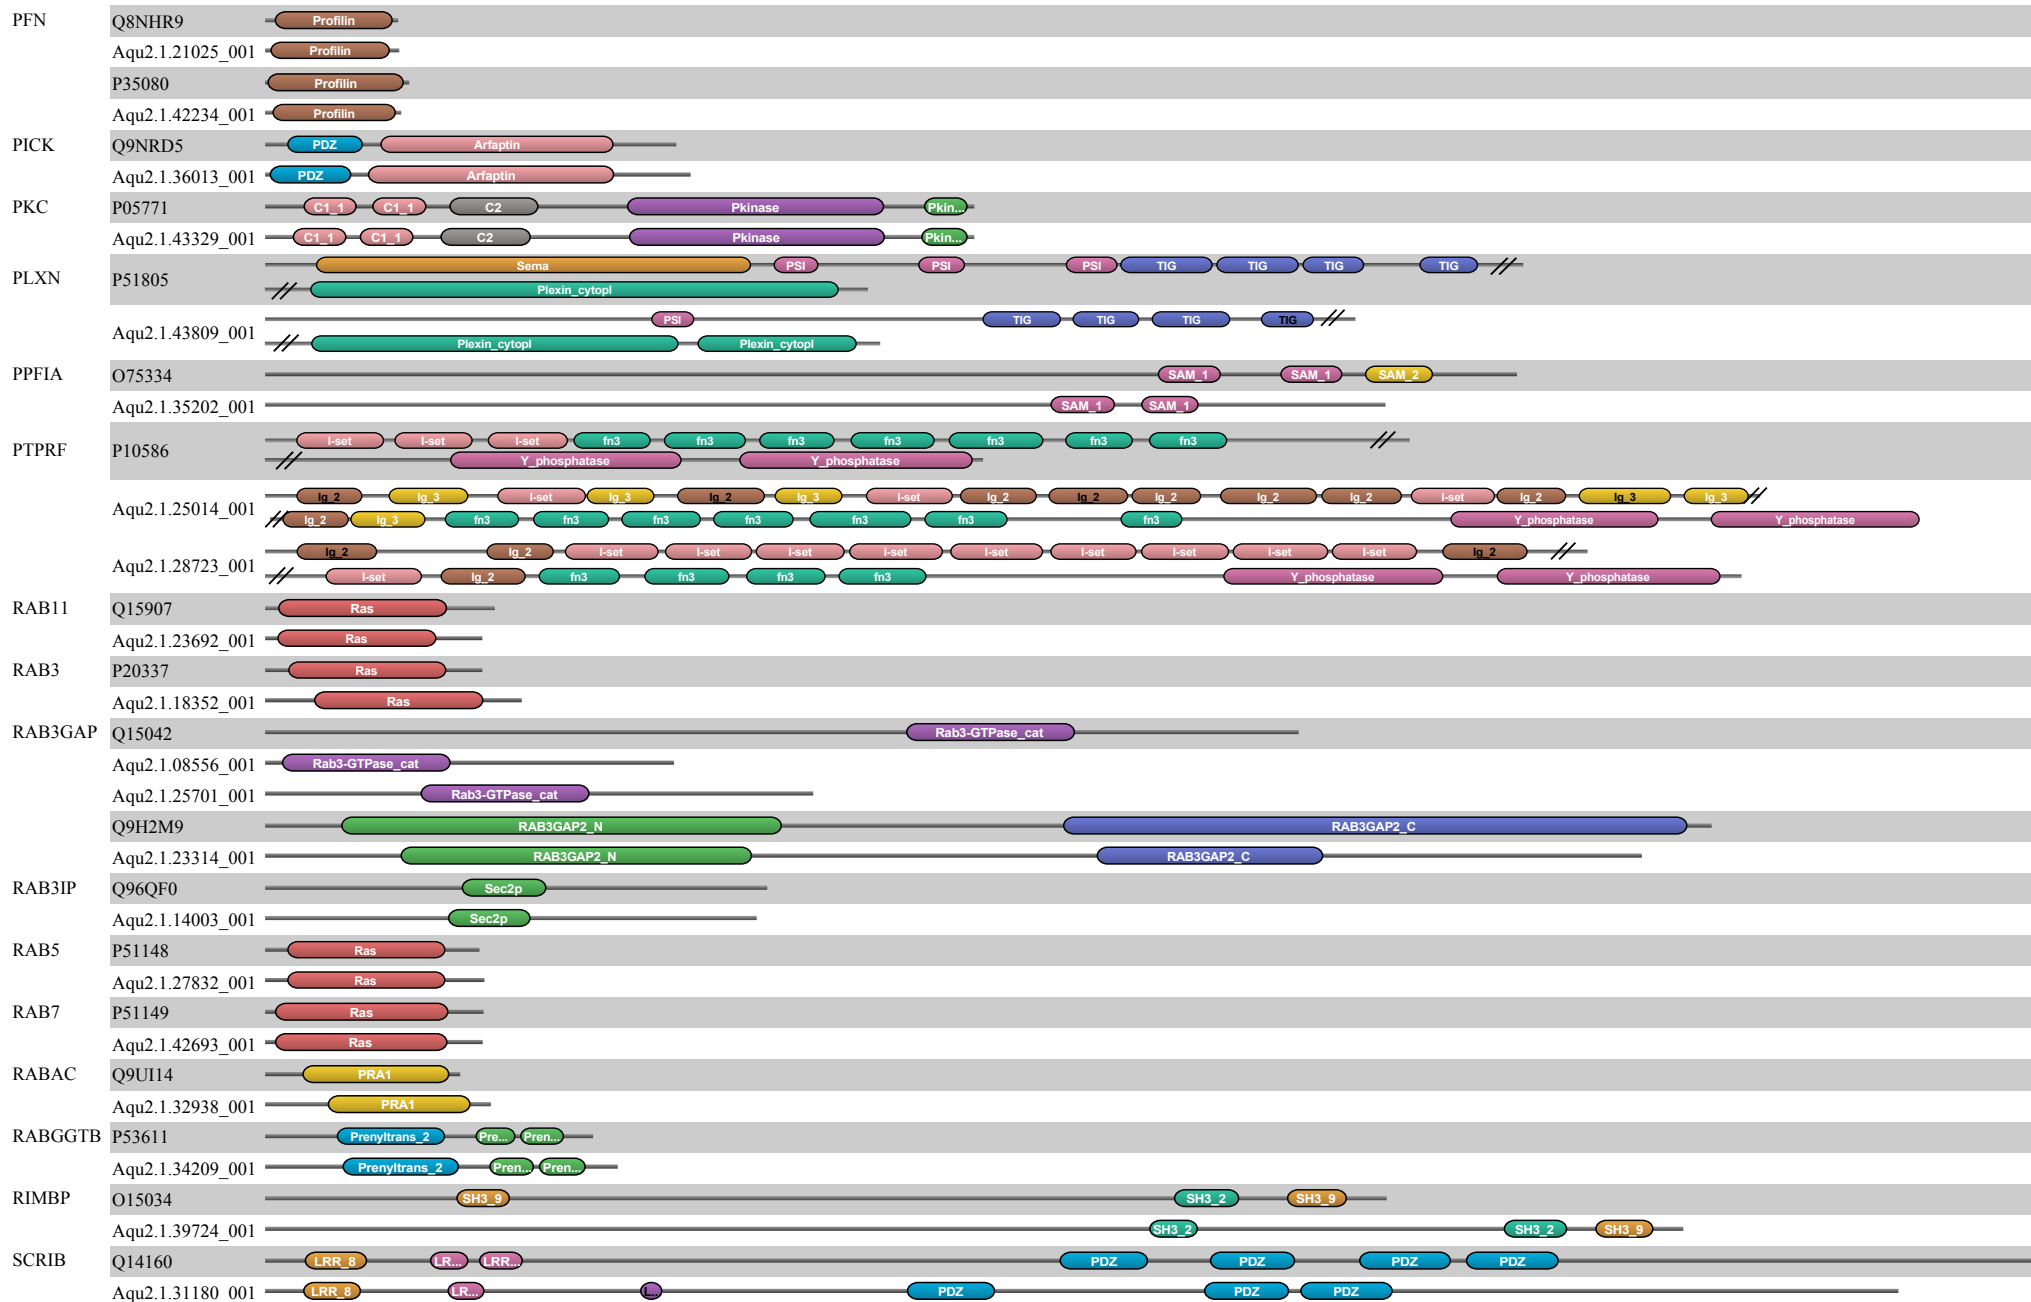

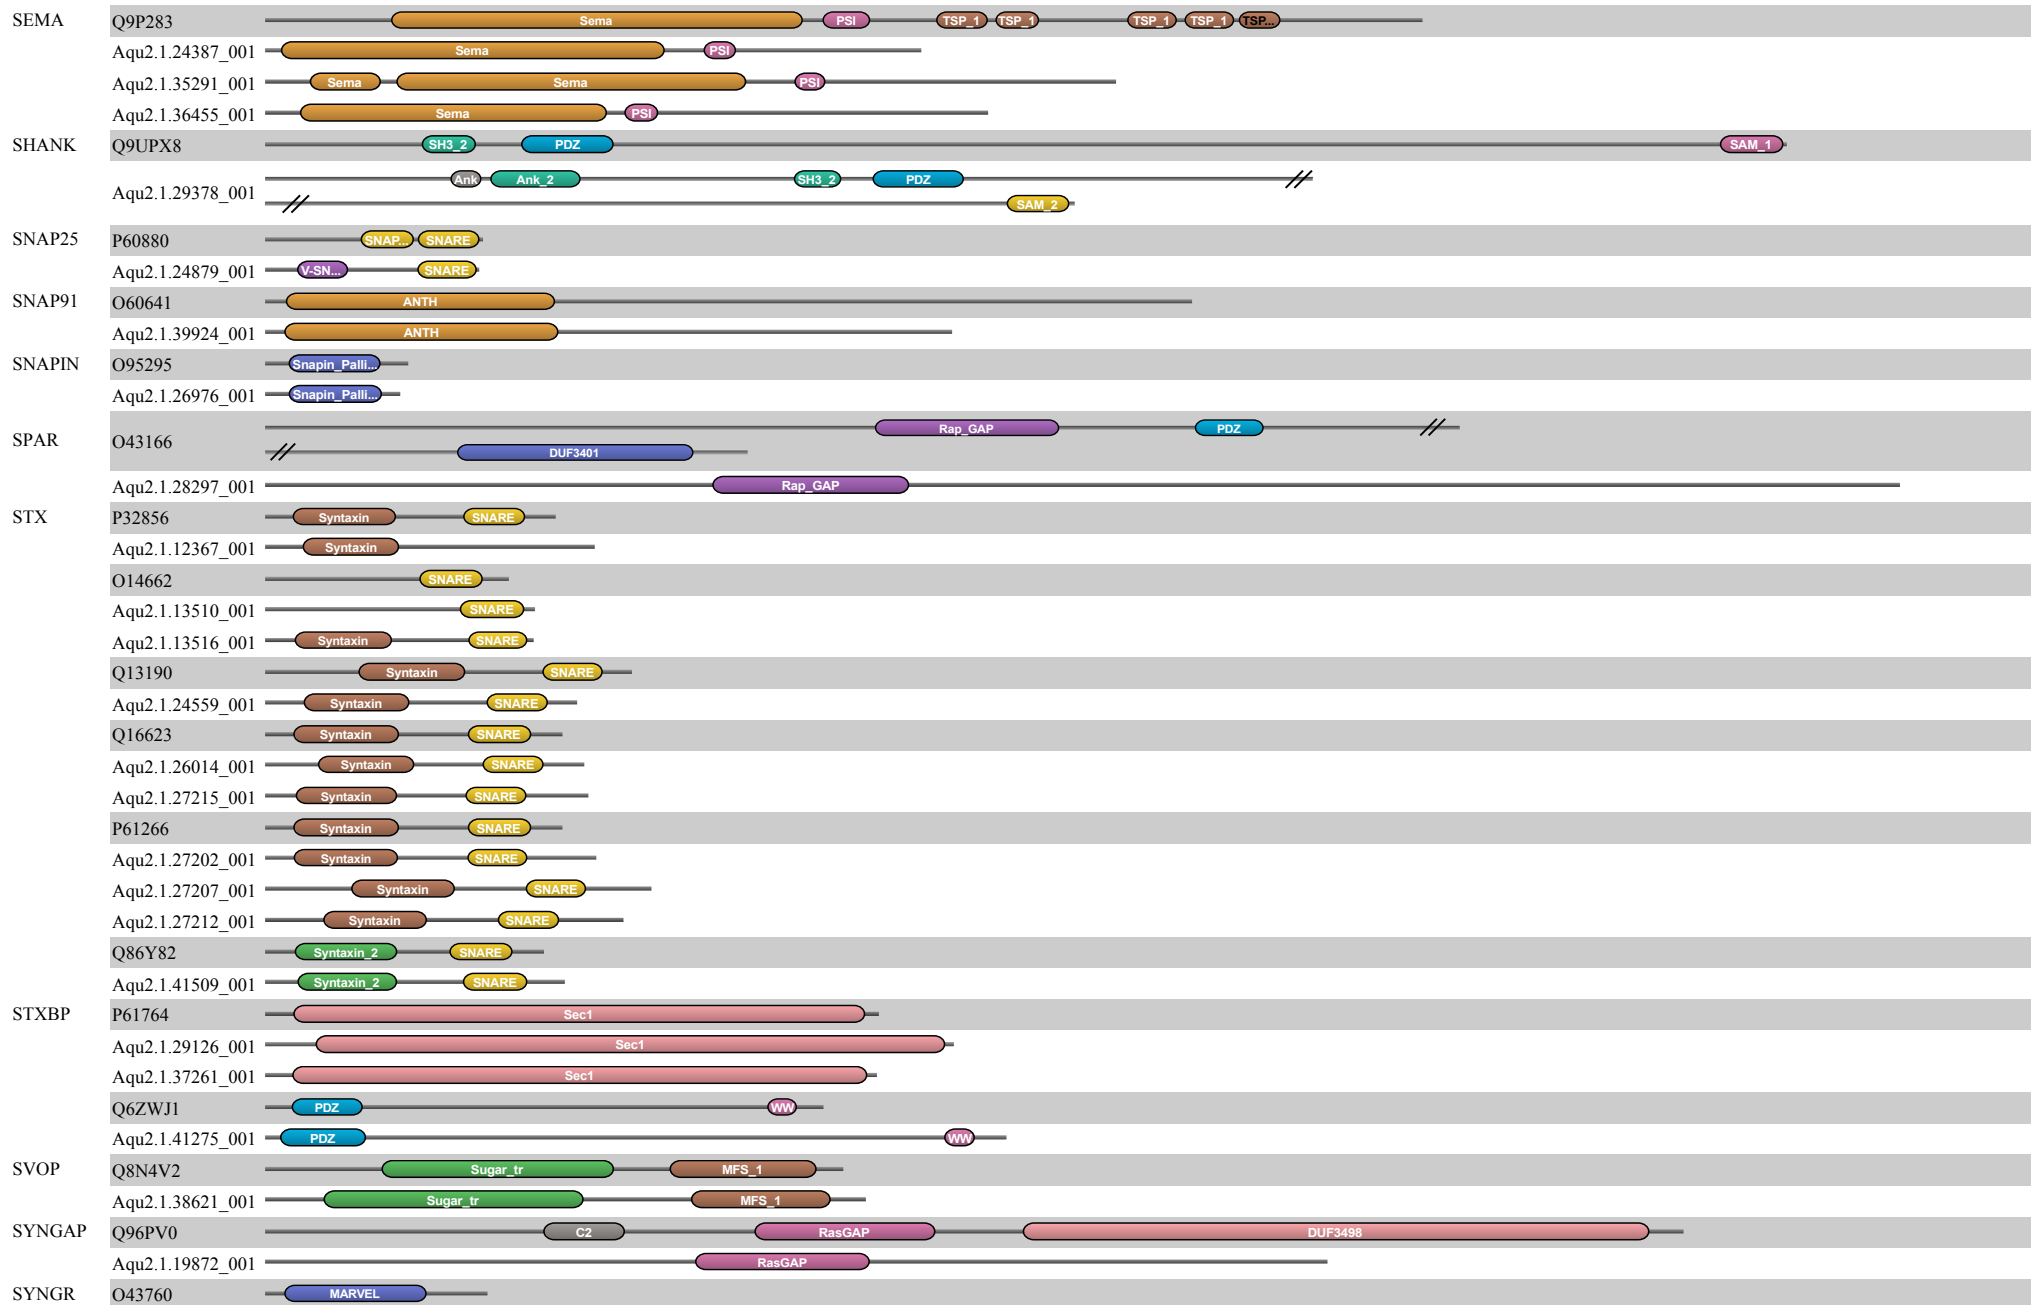

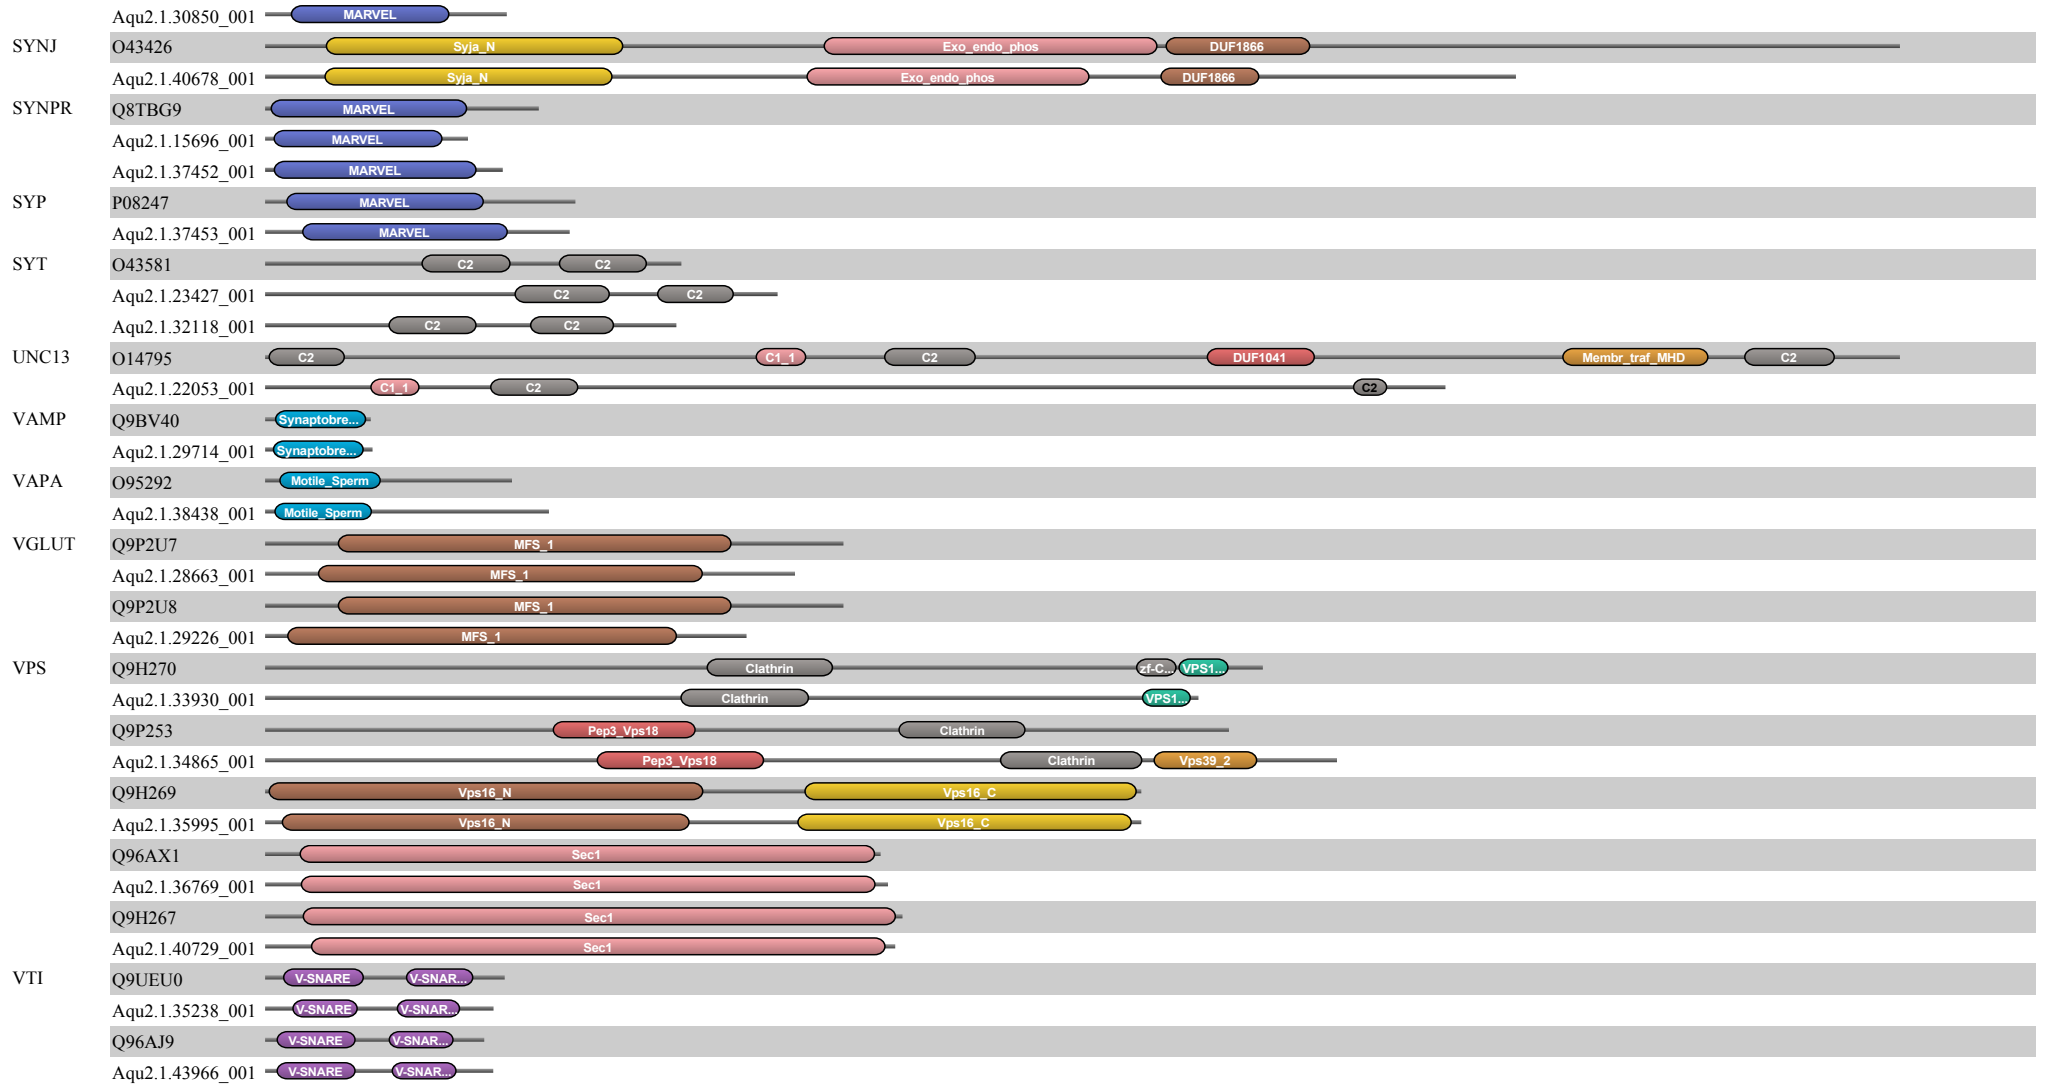

Supplementary Fig. 2.

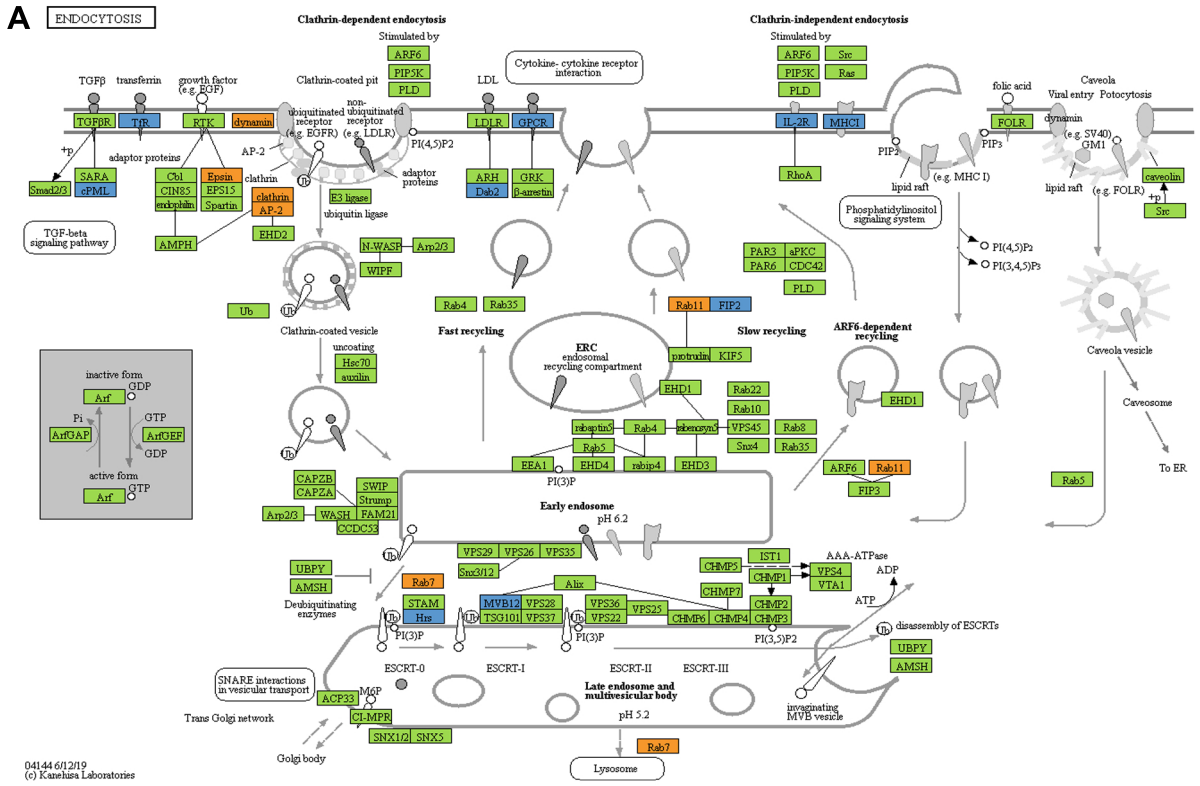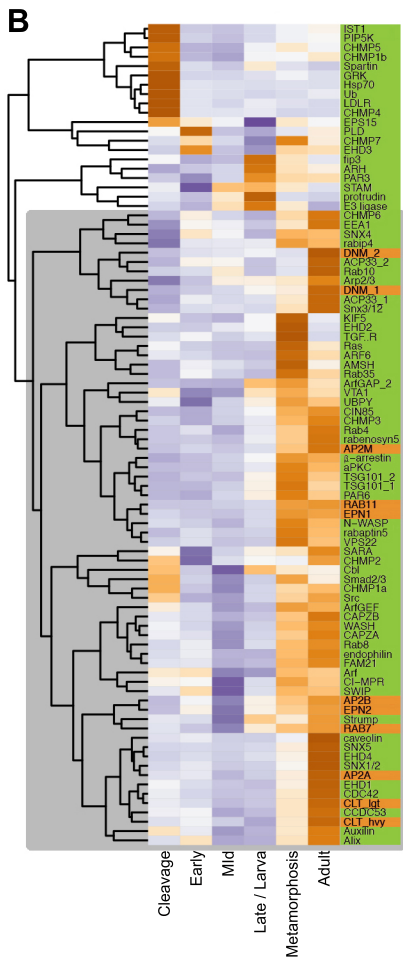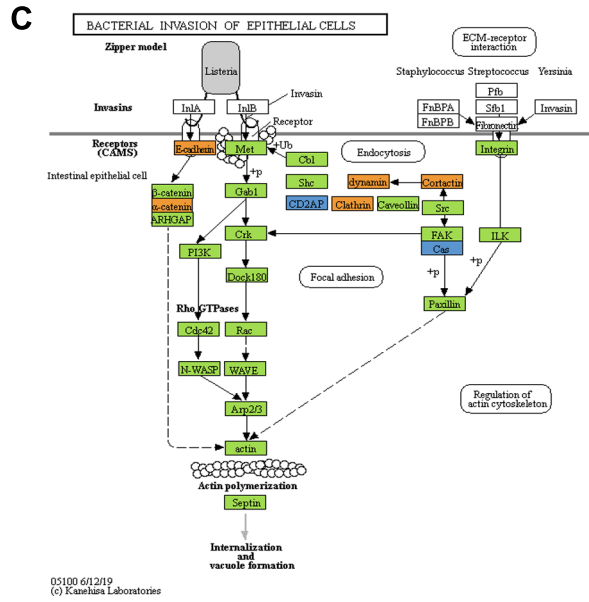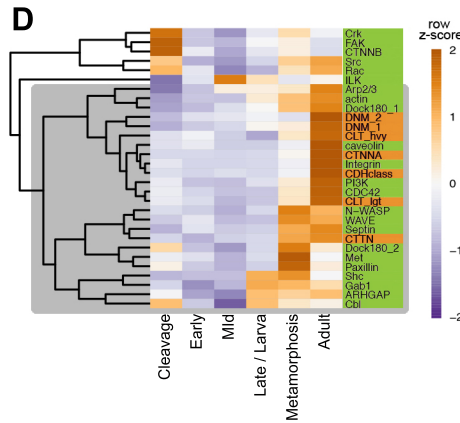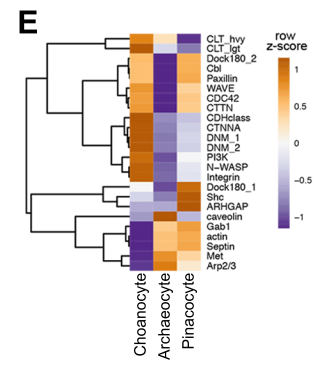

### Supplementary Fig. 3.

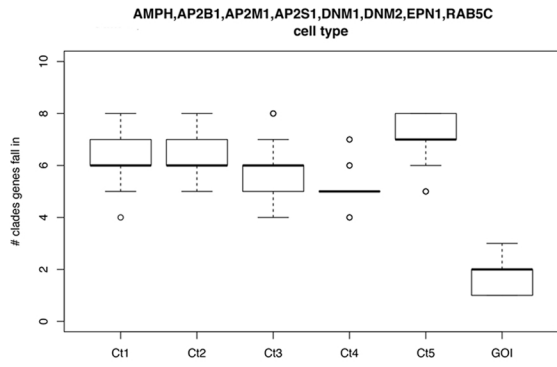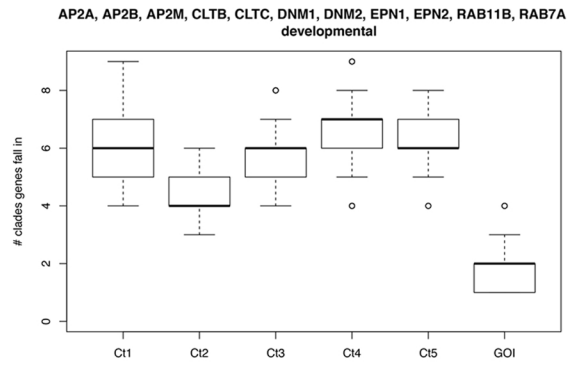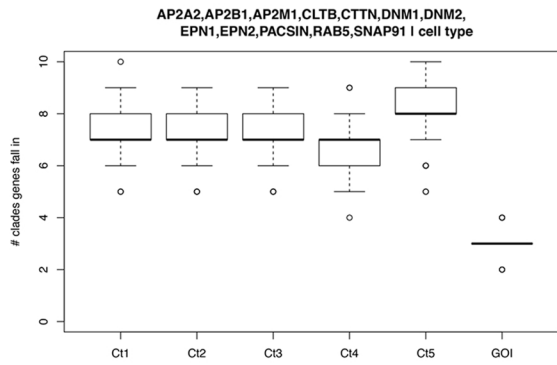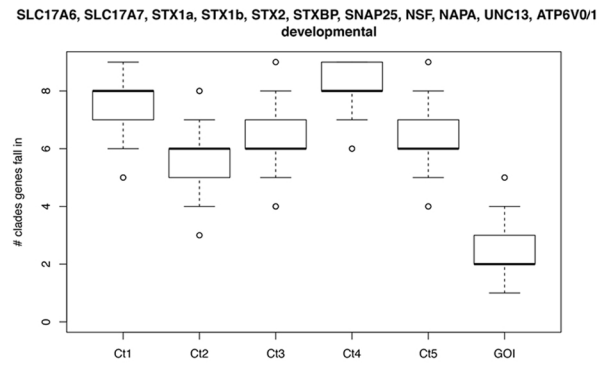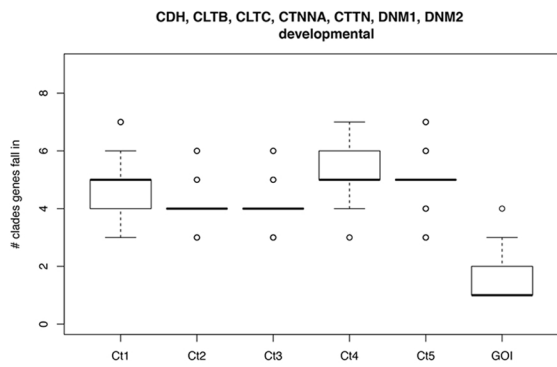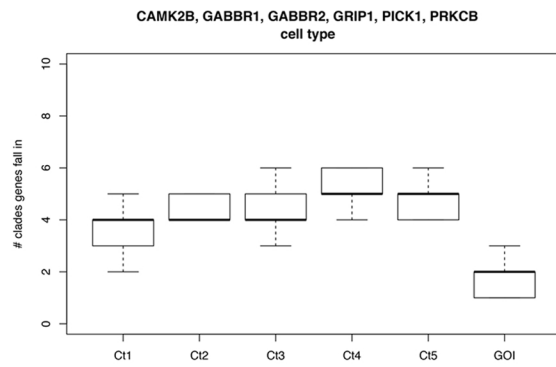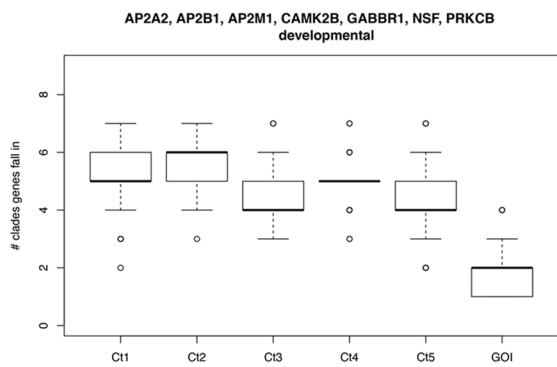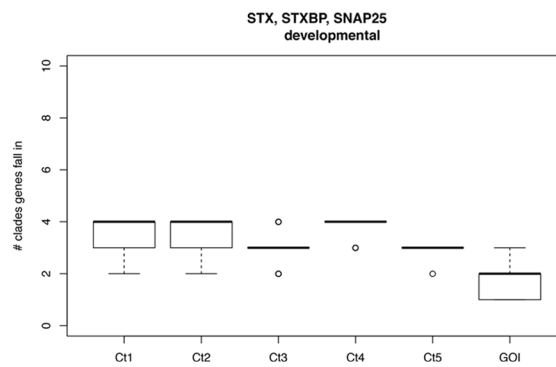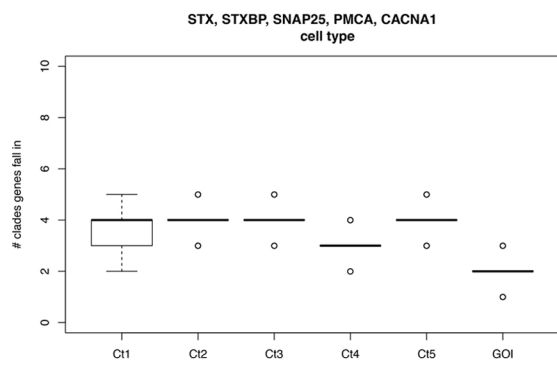

Supplement: 41598_2019_51282_MOESM1_ESM.pdf [file 41598_2019_51282_MOESM1_ESM.pdf]
